1       **Resistance to amitraz in the parasitic honey bee mite**  
2               ***Varroa destructor* is associated with mutations in**  
3               **the  $\beta$ -adrenergic-like octopamine receptor**

4

5 Carmen Sara Hernández-Rodríguez<sup>1</sup>, Sara Moreno-Martí<sup>1</sup>, Gabrielle Almecija<sup>2,3</sup>, Krisztina  
6 Christmon<sup>4</sup>, Josephine D. Johnson<sup>5</sup>, Marie Ventelon<sup>6</sup>, Dennis vanEngelsdorp<sup>4</sup>, Steven C. Cook<sup>5</sup>,  
7 Joel González-Cabrera<sup>1\*</sup>.

8 <sup>1</sup>Instituto de Biotecnología y Biomedicina BIOTECMED. Department of Genetics, Universitat  
9 de València. Dr. Moliner 50. 46100 Burjassot, Spain.

10 <sup>2</sup>APINOV, Scientific Beekeeping and training Center, 10 rue Henri Bessemer, 17140 Lagord,  
11 France.

12 <sup>3</sup>Institut de Recherche sur la Biologie de l’Insecte, UMR 7621, CNRS-Université de Tours,  
13 37200 Tours, France.

14 <sup>4</sup>Department of Entomology, University of Maryland, College Park, Maryland 20742, USA.

15 <sup>5</sup>USDA-ARS Bee Research Laboratory, 13300 Baltimore Ave., Bldg. 306 BARC-E, Beltsville,  
16 MD, USA 20705.

17 <sup>6</sup>Association for the Development of Beekeeping in Auvergne Rhônes Alpes (ADA AURA), 9  
18 allée de Fermat, 63170 Aubière, France

19

20 \*Corresponding authors:

21 Email: [joel.gonzalez@uv.es](mailto:joel.gonzalez@uv.es), [sara.hernandez@uv.es](mailto:sara.hernandez@uv.es)

22 Instituto de Biotecnología y Biomedicina BIOTECMED. Department of Genetics, Universitat  
23 de València. Dr. Moliner 50. 46100 Burjassot, Spain.

24 Tel: +34 96 354 3122

25

26 ORCID:

27 González-Cabrera, J: 0000-0002-8338-370X

28 Hernández-Rodríguez, CS: 0000-0002-1234-1190

29 Almecija, G: 0000-0002-5850-0767

30 **KEYWORDS:** Varroa mite, acaricides, target-site resistance, pollinators, honey bee

31 **SHORT RUNNING TITLE:** Resistance to amitraz in *Varroa destructor*

32

33 **DECLARATIONS**

34 **Funding**

35 Joel González-Cabrera was supported by the Spanish Ministry of Economy and  
36 Competitiveness, Ramón y Cajal Program (RYC-2013-261 13834). The work at the Universitat  
37 de València was funded by the Spanish Ministry of Economy and Competitiveness (grant:  
38 CGL2015-65025-R, MINECO/FEDER, UE), Spanish Ministry of Science, Innovation and  
39 Universities (grant: RTI2018-095120-B-100/FEDER, UE) and the Foundation for Food and  
40 Agricultural Research, Washington DC, USA (grant: 552951). Sample collection in the USA  
41 were funded by the US National Honey Bee Disease Survey USDA-APHIS (16-8100-1624-CA,  
42 15-8100-1624-CA).

43 **Declaration of interest**

44 There are no competing interests to declare.

45 **Ethics approval**

46 This study does not contain any experiments using any animal species that require ethical  
47 approval.

48 **Consent to participate**

49 Not applicable

50 **Consent for publication**

51 All authors consent to the publication of this manuscript.

52 **Availability of data and material**

53 The datasets generated and analysed during the current study are available within the article and  
54 its supplementary materials, as well as from the corresponding author on reasonable request.

55 **Authors' contributions**

56 CSHR and JGC designed research. CSHR, SMM, GA, KC, JDJ, JGC conducted experiments  
57 and analysed data. GA, MV, KC, SCC, DvE, contributed biological samples. All contribute to  
58 writing the manuscript.

### 59 **Acknowledgements**

60 The authors thank the Bee Informed Partnership (thanks Dr. Nathalie Steinhauer, and Project  
61 Apis m), beekeepers and beekeepers' associations from different countries for providing the  
62 mite samples used in this study. Thanks to Klemens Krieger for his support and personal  
63 implication at the beginning of this research effort. A previous version of this manuscript was  
64 revised by Frank Rinkevich (USDA, Baton Rouge, Louisiana) his comments and suggestions  
65 were used to improve the final version.

66

67 **Abstract**

68 *Varroa destructor* is considered a major reason for high loss rate of Western honey bee (*Apis*  
69 *mellifera*) colonies. To prevent colony losses caused by *V. destructor* it is necessary to actively  
70 manage the mite population. Beekeepers, particularly commercial beekeepers, have few  
71 alternative treatments other than synthetic acaricides to control the parasite, resulting in  
72 intensive treatment regimens that led to the evolution of resistance in mite populations.

73 To investigate the mechanism of the resistance to amitraz detected in *V. destructor* mites from  
74 French and U.S. apiaries, we identified and characterized octopamine and tyramine receptors  
75 (the known targets of amitraz) in this species. The comparison of sequences obtained from mites  
76 collected from different apiaries with different treatment regimens, showed that the amino acid  
77 substitutions N87S or Y215H in the Oct $\beta$ R were associated with treatment failures reported in  
78 French or U.S. apiaries, respectively. Based on our findings, we have developed and tested two  
79 high throughput diagnostic assays based on TaqMan<sup>®</sup> able to accurately detect mites carrying  
80 the mutations in this receptor. This valuable information may be of help for beekeepers when  
81 selecting the most suitable acaricide to manage *V. destructor*.

82

## 83 INTRODUCTION

84 The ectoparasitic mite *Varroa destructor* (Anderson and Trueman), shifted hosts from the  
85 Eastern honeybee (*Apis cerana* L.) to the Western honey bee (*Apis mellifera* L.) in the late  
86 1950's (Traynor et al. 2020). Since then, it has spread almost exclusively as clonal lineages  
87 throughout the world (Solignac et al. 2005). In *A. cerana*, *V. destructor* causes little damage to  
88 the colonies since the parasite's population growth is limited as mites can only reproduce in  
89 drone brood, which are only available in large numbers early in summer. In contrast, *V.*  
90 *destructor* successfully reproduces in both drone and worker brood of *A. mellifera* (Beaurepaire  
91 et al. 2015). *Varroa destructor* damages the host by feeding directly on the fat bodies, by  
92 vectoring viruses (Boecking and Genersch 2008; Ramsey et al. 2019) and reducing natural  
93 defences (Aronstein et al. 2012). If left unmanaged, *V. destructor* will kill the colonies within a  
94 few years (Martin et al. 1998). This mite is considered one of the major causes for seasonal  
95 colony losses of the Western honey bee (Steinhauer et al. 2018).

96 Beekeepers have an assortment of chemical and non-chemical methods to implement  
97 Integrated Pest Management (IPM) strategies for controlling *V. destructor*. Most of beekeepers  
98 use synthetic chemicals to treat their colonies, since they are easier to use and appear to be most  
99 effective and consistent at reducing losses (Rosenkranz et al. 2010; Haber et al. 2019). Globally,  
100 the most commonly registered acaricides are the pyrethroids flumethrin and tau-fluvalinate, the  
101 organophosphate coumaphos, and the formamidine amitraz. In the past, tau-fluvalinate and  
102 coumaphos have been the most widely used treatments, but now these pesticides are less  
103 effective. The intensive use of pyrethroids to control *V. destructor* since the 1980's resulted in  
104 the independent emergence of resistance to these chemicals in mite populations from Europe  
105 and North America (Milani 1995; Elzen et al. 1998; Mozes-Koch et al. 2000; Sammataro et al.  
106 2005; Gracia-Salinas et al. 2006; Kim et al. 2009; González-Cabrera et al. 2013; Hubert et al.  
107 2014; González-Cabrera et al. 2016; González-Cabrera et al. 2018). Coumaphos was brought to  
108 market as an alternative varroacide treatment, but overuse of this product also resulted in the  
109 evolution of resistance (Elzen and Westervelt 2002; Maggi et al. 2009; Maggi et al. 2011).

110 Moreover, residues of varroacides persist and accumulate in beeswax (Bonzini et al. 2011;  
111 Calatayud-Vernich et al. 2018; Traynor et al. 2020), posing a sublethal threat to honey bees  
112 (Desneux et al. 2007) and possibly maintaining the selection pressure on mite populations, so  
113 preventing resistance reversion, as already reported for pyrethroids resistance in *V. destructor*  
114 (Milani and Della Vedova 2002; Medici et al. 2016; González-Cabrera et al. 2018; Mitton et al.  
115 2018).

116 To delay the evolution of resistance, rotation of products with different modes of action  
117 is recommended (IRAC; <https://www.irac-online.org/>), but the lack of effective alternatives  
118 makes chemical rotation a non-practical solution for beekeepers. As a result, beekeepers are  
119 over reliant on amitraz to control mites (Haber et al. 2019), which would select for resistant  
120 mites and it may explain consistent field reports of reduced miticidal (Elzen et al. 1999; Elzen et  
121 al. 2000; Rodríguez-Dehaibes et al. 2005; Maggi et al. 2010; Kamler et al. 2016; Rinkevich  
122 2020).

123 In *V. destructor*, the mechanism of resistance to pyrethroids is already known. It is  
124 caused by substitution of key residues within the voltage gated sodium channel (VGSC), the  
125 major target site for pyrethroids (González-Cabrera et al. 2013; Hubert et al. 2014; González-  
126 Cabrera et al. 2016; González-Cabrera et al. 2018). Regarding the resistance to coumaphos,  
127 studies carried out with other species have reported that it may be associated with either  
128 mutations in its target site, the enzyme acetylcholinesterase, duplication of the  
129 acetylcholinesterase gene, or with alterations in the expression of detoxification enzymes  
130 (Feyereisen et al. 2015). However, in *V. destructor*, the mechanism(s) involved in the resistance  
131 to coumaphos remains unclear. The downregulation of a cytochrome P450 involved in the  
132 activation of coumaphos have been described as associated with the resistance reported in mites  
133 collected from the Greek island of Andros (Vlogiannitis et al. 2021).

134 In insects and acari, amitraz binds to the receptors of octopamine and tyramine (Kumar  
135 2019). The octopamine (OAR) and the tyramine (TAR) receptors belong to the superfamily of  
136 G-protein coupled receptors (GPCRs). GPCRs are known to be involved in recognizing

137 extracellular messengers, transducing signals to the cytosol, and mediating the cellular  
138 responses necessary for the normal physiological functions of organisms (Liu et al. 2021).  
139 Octopamine and tyramine receptors are classified as  $\alpha$ -adrenergic-like octopamine receptors  
140 ( $\text{Oct}\alpha_1\text{Rs}$  and  $\text{Oct}\alpha_2\text{Rs}$ ),  $\beta$ -adrenergic-like octopamine receptors ( $\text{Oct}\beta_1\text{Rs}$ ,  $\text{Oct}\beta_2\text{Rs}$ , and  
141  $\text{Oct}\beta_3\text{Rs}$ ), and tyramine receptors (TAR1, TAR2, TAR3) (Finetti et al. 2021).

142         Uncovering the molecular mechanisms involved in resistance to pesticides is essential  
143 for rapid detection and for designing effective management approaches. In this study, we  
144 identified and characterized octopamine and tyramine receptors of *V. destructor*. Two amino  
145 acid substitutions in  $\text{Oct}\beta_2\text{R}$  associated with reported field treatment failures of amitraz in  
146 France and the U.S. were identified. Finally, two robust high throughput diagnostic assays were  
147 developed to identify *V. destructor* mites carrying these mutations in order to aid in resistance  
148 management in affected communities.

149

## 150 MATERIAL AND METHODS

151

### 152 *V. destructor* samples

153 Samples reporting failures after treatment with amitraz in France were collected in 2019 from  
154 five apiaries belonging to departments 38 (Isère), 42 (Loire), and 63 (Puy-de-Dôme). These  
155 apiaries have been treated with amitraz for several years in a row. Mites were collected from  
156 capped brood at the end of treatment with amitraz (70 days after the application of strips) and  
157 stored at -20 °C until used for molecular analysis. Mites collected at departments 4 (Alpes-de-  
158 Haute-Provence), 26 (Drôme), and 49 (Maine-et-Loire) were not treated with amitraz for at least  
159 one year before collection.

160 U.S. samples were collected as part of different surveys and research efforts not specifically  
161 designed for identification of the mechanism of resistance to amitraz (Table S1). Bee Informed  
162 Partnership Inc. (BIP) conducted a field trial in the fall of 2018 to test the efficacy of the

163 product Apivar<sup>®</sup> (a.i. amitraz) to reduce *V. destructor* mite infestation in colonies from active  
164 commercial beekeeping operations in the U.S. The trial was conducted within 2 commercial  
165 beekeeping operations from 2 different geographic regions. A total of 72 colonies (12 colonies  
166 per yard, in 3 yards for each operation) were followed over 42 days after treatment. In each  
167 yard, half of the colonies were treated with Apivar<sup>®</sup> while the other half received a positive  
168 control product, Apilife Var<sup>®</sup> (a.i. thymol). *Varroa destructor* load was estimated by a lab wash  
169 of a sample of ~300 bees collected from a brood frame (Dietemann et al. 2013).

170 Phoretic mites from the BIP project were collected from colonies taking part in field trials  
171 conducted in Oregon and Michigan in 2018. The mites collected were those still in the colony  
172 while treatments were ongoing, and so survived at least a partial treatment exposure. Of mites  
173 from the 72-colony trial, we randomly chose mites from four colonies being treated with  
174 Apivar<sup>®</sup> and four colonies treated with Apilife Var<sup>®</sup> as positive control. We also analysed some  
175 mites collected in 2020 as part of the U.S. National Honey Bee Disease Survey (NHBDS). We  
176 looked at samples collected from Delaware, Massachusetts, Montana and Pennsylvania. Mite  
177 samples previously used to detect tau-fluvalinate resistance in U.S. mite populations and  
178 collected from these same states but from 2016 and 2017 NHBDS efforts, were also used  
179 (Millán-Leiva et al. 2021a). Samples from New Jersey were sent by a New Jersey state apiarist  
180 and were collected from apiaries reporting amitraz failure in 2018 (Styles, Personal  
181 communication).

182 Susceptible samples were collected from 2016 to 2019 in apiaries without exposure to amitraz  
183 from Iran, New Zealand, Spain, and the UK.

#### 184 **Evaluation of amitraz efficacy**

185 Acaricide efficacy of the amitraz treatments in MM16 and J11 French apiaries were calculated  
186 according to the Guideline on veterinary medicinal products controlling *Varroa destructor*  
187 parasitosis in bees (EMA 2010). Amitraz strips were introduced into hives at day 1 and they  
188 were removed at day 70. The number of mites in the inspection boards was registered every two



189 days along the treatment. The residual number of mites was determined with a follow-up  
190 treatment using oxalic acid at day 91 and the final count of the dead mites at day 106. The  
191 treatment efficacy (E) was calculated as % of mite reduction as follows:

$$E (\%) = \frac{\text{mites dropped by treatment (day 91)}}{\text{mites dropped by treatment} + \text{mites dropped after followup treatment}} \times 100$$

## 192 **Identification of receptors and phylogenetic analysis**

193 Analysis of the contigs resulting from a transcriptomic analysis of *V. destructor* were previously  
194 carried out by our laboratory (BioProject ID PRJNA531374), allowing us to annotate putative  
195 octopamine-like receptors. The identity of these sequences was validated after searching in the  
196 *V. destructor* genome (BioProject PRJNA413423) (Techer et al. 2019) via BLASTn. Further  
197 comparison with previously annotated octopamine and tyramine receptors from related  
198 arthropod species was also carried out via multiple sequence alignment (47 sequences of  
199 octopamine and tyramine receptors were used, see Table S2). Protein alignments, tree  
200 generation for the phylogenetic analysis, electropherogram editions and sequence assembling  
201 were conducted using Geneious software (Geneious version 9.1.5 (<http://www.geneious.com>  
202 (Kearse et al. 2012)). Figures representing protein alignments were generated using CLC  
203 Sequencer Viewer 6.8.1. ([www.clcbio.com](http://www.clcbio.com)).

## 204 **Amplification and sequencing of receptor cDNAs**

205 Pools of 5 mites were ground to powder in liquid nitrogen and total RNA was extracted using  
206 the RNeasy Mini Kit (Qiagen) according to the manufacturer's recommendations. RNA (0.5 – 1  
207 µg) was reverse transcribed to cDNA using Maxima H minus First Strand cDNA synthesis kit  
208 (ThermoFisher Scientific) using oligo dT<sub>18</sub> (250 ng). First strand cDNA was used as a template  
209 for PCR. Amplification of *Vd\_octα<sub>2r</sub>* Open Reading Frame (ORF) was conducted using primers  
210 *Vd\_OctAR\_5UTR* and *Vd\_OctAR\_3UTR*. Amplification of *Vd\_octβ<sub>2r</sub>* ORF was done using  
211 primers *Vd\_OctBR\_5UTR1* and *Vd\_OctBR\_3UTR*. Amplification of *Vd\_tar1* ORF was carried  
212 out using primers *Vd\_TAR1\_5F* and *TAR1\_3R* (Table S3). For PCR amplifying the ORFs, 1 µl

213 of cDNA was mixed with 100 ng of each primer, 25  $\mu$ l of DreamTaq Green PCR Master Mix  
214 (ThermoFisher Scientific) and water to a final volume of 50  $\mu$ l. Cycling conditions were: 94  $^{\circ}$ C  
215 for 2 min followed by 35 cycles of 94  $^{\circ}$ C for 45 s, 60  $^{\circ}$ C for 45 s and 72  $^{\circ}$ C for 2 min, and final  
216 extension at 72  $^{\circ}$ C for 5 min. The PCR fragments were purified using the NucleoSpin<sup>TM</sup> Gel and  
217 PCR Clean-up Kit (Thermo Scientific) and sequenced (Stabvida, Portugal) using the sets of  
218 primers showed in Table S3.

### 219 **Genomic DNA sequencing**

220 DNA was extracted from individual mites using DNAzol<sup>®</sup> reagent (ThermoFisher Scientific)  
221 following the manufacturer's protocol. Primers used to PCR amplify and sequence the  
222 octopamine and tyramine receptor genes are described in Table S3. The mutation at position  
223 260 of *oct $\beta$ 2r* was screened by amplifying the genomic region flanking the mutation site with  
224 primers Vd\_OctBR\_5UTR3 and Vd\_OctBR\_563R. The flanking region of the mutation at  
225 position 643 of *oct $\beta$ 2r* was amplified with primers Vd\_OctBR\_476F and Vd\_OctBR\_437iR.  
226 The PCR conditions were similar to those described above except for the extension step, which  
227 was run at 72  $^{\circ}$ C for 1 min. PCR amplicons were purified and sequenced as described above.

### 228 **Protein structure simulation**

229 The online server for protein structure prediction I-TASSER (Yang and Zhang 2015) was used  
230 to generate a theoretical three-dimensional structure of *V. destructor* Oct $\beta$ 2R and TAR1. From  
231 the default settings of I-TASSER, the structure conformation with higher C-score for each  
232 receptor was chosen. C-score is typically in the range of [-5, 2], where a C-score of a higher  
233 value indicates a model with a higher confidence and vice-versa. The topology of the Oct $\beta$ 2R  
234 receptor in the membrane was represented using the webservice PROTTER (Omasits et al.  
235 2014), which uses Phobius (Kall et al. 2004) for prediction of transmembrane topology and the  
236 N-terminal location. The predictions about the effects of the mutations in the receptor were  
237 obtained with SNAP2 (Hecht et al. 2015), PolyPhen2 (Adzhubei et al. 2010), I-Mutant2.0  
238 (<https://folding.biofold.org/i-mutant/i-mutant2.0.html>), and HOPE (Venselaar et al. 2010).

## 239 **TaqMan<sup>®</sup> diagnostic assays**

240 The sequence of the *Vd\_octβ<sub>2</sub>r* gene described in this study was used to design primers  
241 (flanking the N87 and Y215 positions in the Vd\_Octβ<sub>2</sub>R protein) and two minor groove-binding  
242 probes (MGB) (ThermoFisher Scientific) using the Custom TaqMan<sup>®</sup> Assay Design Tool  
243 (<https://www.thermofisher.com/order/custom-genomic-products/tools/genotyping/>). For the  
244 detection of N87S mutation, forward OctR\_Vd\_87\_F (5'-CGCCCTGTTCGCGATGA-3') and  
245 reverse OctR\_Vd\_87\_R (5'-ATCCAATTGCCCGAAATGGT-3') primers (standard  
246 oligonucleotides with no modification) were used. The probe Vd\_N87S\_V (5'-  
247 ACGACGCATTGAATG-3') was labelled with the fluorescent dye VIC<sup>®</sup> for the detection of  
248 the wild-type allele, and the probe Vd\_N87S\_M (5'-CGACGCACTGAATG-3') was labelled  
249 with the fluorescent dye 6FAM<sup>™</sup> for detection of the N87S mutation. For the detection of  
250 Y215H mutation, forward OctR\_Vd\_215\_F (5'-GGATACCGTGCTCAGTAATGCT-3') and  
251 reverse OctR\_Vd\_215\_R (5'-CTGTCGGGTCGCTTCTAGATAG-3') primers (standard  
252 oligonucleotides with no modification) were used. The probe Vd\_Y215H\_V (5'-  
253 ATGCGCCAATAAGTGAAT-3') was labelled with the fluorescent dye VIC<sup>®</sup> for the detection  
254 of the wild-type allele, and the probe Vd\_Y215H\_M (5'-CGCCAATGAGTGAAT-3') was  
255 labelled with the fluorescent dye 6FAM<sup>™</sup> for detection of the Y215H mutation. Each probe  
256 also had a 3'-non-fluorescent quencher and a minor groove binder at the 3' end. This minor  
257 groove binder increases the T<sub>m</sub> between matched and mismatched probes providing more  
258 accurate allele discrimination (Afonina et al. 1997). Genomic DNA extraction from adult mites  
259 and TaqMan<sup>®</sup> assays were carried out as described by González-Cabrera et al. (2013) using a  
260 StepOne Real-Time PCR System (ThermoFisher Scientific).

261

## 262 **RESULTS**

### 263 **Identification of *V. destructor* octopamine and tyramine receptors**

264 Manual curation of transcriptomic data obtained in our laboratory (BioProject ID  
265 PRJNA531374) showed that a few contigs contained sequences likely belonging to G protein-  
266 coupled receptors (GPCR) and more specifically to octopamine-like receptors. These were used  
267 as queries to search via BLASTn in the recently released *V. destructor* genome (Techer et al.  
268 2019). Thus, contigs c139848\_g8\_i1 (1227 bp), and c143491\_g6\_i5 (2547 bp), mapped to the  
269 locus LOC111253729, annotated as a G-protein couple receptor (XP\_022669321.1), and to the  
270 locus LOC111251882, annotated as an octopamine receptor beta-2R-like (XP\_022664702.1),  
271 respectively. Since in *Rhipicephalus microplus*, a tyramine receptor (GenBank accession  
272 number CAA09335) was previously associated with resistance to amitraz (Kumar 2019), the  
273 homologous gene was searched in the *V. destructor*'s genome. The locus LOC111254088,  
274 annotated as octopamine-like receptor in the *V. destructor* database, showed the highest identity  
275 with the gene encoding the CAA09335 protein from *R. microplus*. Phylogenetic analysis was  
276 then conducted with these proteins and with others, annotated as octopamine receptors, from  
277 several arthropod species (Table S2). The phylogenetic tree obtained from the alignment of 47  
278 proteins clustered into three main groups, consisting of  $\alpha_2$ -adrenergic-like octopamine receptors  
279 (Oct $\alpha_2$ Rs),  $\beta$ -adrenergic-like octopamine receptors (Oct $\beta$ Rs), and type 1 Tyramine receptors  
280 (TAR1). The branch corresponding to Oct $\beta$ Rs included three classes of receptors: Oct $\beta_1$ R,  
281 Oct $\beta_2$ R, and Oct $\beta_3$ R. Regarding the proteins from *V. destructor* in the alignment,  
282 XP\_022669321 grouped with Oct $\alpha_2$ Rs; XP\_022664702 is included in the branch corresponding  
283 the Oct $\beta_2$ Rs, and XP\_022670329 is related with TAR1s (Fig. 1). From this analysis, we called  
284 XP\_022669321, XP\_022664702, and XP\_022670329 proteins, as Vd\_Oct $\alpha_2$ R, Vd\_Oct $\beta_2$ R, and  
285 Vd\_TAR1, respectively.

### 286 **Vd\_Oct $\alpha_2$ R protein**

287 Vd\_Oct $\alpha_2$ R encoded for a 532 amino acids protein. When Vd\_Oct $\alpha_2$ R was aligned to other  $\alpha$ -  
288 adrenergic-like octopamine receptors, a high degree of conservation was observed among  
289 species, mainly in the regions corresponding to the predicted seven  $\alpha$ -helices of the proteins'

290 tertiary structure (Fig. 2A). The percentage of identity between Vd\_Oct $\alpha_2$ R and the  $\alpha$ -receptors  
291 from other acari species was 82 % for *Galendromus occidentalis*, 68 % for *Tropilaelaps*  
292 *mercedesae*, 52 % for *R. microplus* and 50 % for *Ixodes scapularis*. Conserved motifs common  
293 to GPCR were found in  $\alpha$ -helices III, VI, VII, and the C-terminus (Fig. 2A).

#### 294 **Vd\_Oct $\beta_2$ R protein**

295 Vd\_Oct $\beta_2$ R encoded for a 439 amino acids protein. The percentage of identity between  
296 Vd\_Oct $\beta_2$ R and the  $\beta$ -adrenergic-like octopamine receptor from other closely related acari  
297 species in the cladogram were 83 % for *T. mercedesae*, 79 % for *G. occidentalis*, 68 % for *R.*  
298 *microplus* and 65 % for *I. scapularis*. Multiple sequence alignment of Oct $\beta$ R from these  
299 species showed that, as in Vd\_Oct $\alpha_2$ R, Vd\_Oct $\beta_2$ R contained highly conserved regions  
300 corresponding to the seven  $\alpha$ -helices typical of GPCR (Fig. 2B). The modelling of the  
301 Vd\_Oct $\beta_2$ R three-dimensional structure, obtained with I-TASSER online server, showed the  
302 common structure described in GPCRs: seven transmembrane (TM) helical bundle connected  
303 by three extracellular loops (EL) and three intracellular loops (IL) (Fig. 3A). The N-terminus of  
304 the protein was at the extracellular side and the C-terminus was located intracellularly. In this  
305 structure, the ligand-pocket would be close to the extracellular region and surrounded by the  
306 transmembrane helical domain (Marsh 2015). The molecular simulation of transmembrane  
307 regions using Phobius software predicted which residues were “buried” into the membrane or  
308 exposed to intracellular or extracellular regions (Fig. 4). Other features characterizing Oct $\beta$ R  
309 were also found in Vd\_Oct $\beta_2$ R (Fig. 4). The receptor had two highly conserved cysteine  
310 residues in TM3 and EL2 which form a disulphide bond, which is important for stabilizing the  
311 conformation of the extracellular region and shaping the entrance to the ligand-binding pocket  
312 (Rader et al. 2004). Three motifs of amino acids involved in molecular switches in GPCRs  
313 during activation were also found in Vd\_Oct $\beta_2$ R: i) the D[E]RY motif in helix III, which often  
314 forms a so-called “ionic lock”. The ionic lock was suggested as a characteristic of the inactive  
315 conformation of GPCRs, blocking the G-protein binding at the cytoplasmic region; ii) the

316 CWxP motif observed in  $\alpha$ -helix VI, considered as one of the micro-switches that have  
317 substantially different conformations in the active state versus the inactive state of the receptor;  
318 iii) the NP(L/D)IY motif in helix VII, involved in a permanent rotameric change (Filipek 2019)  
319 (Fig. 2B and Fig. 4). As in most of the GPCR structures, the C-terminus contains a 3-4 turn  $\alpha$ -  
320 helix,  $\alpha$ -helix VIII, that runs parallel to the membrane and is characterized by a common  
321 (F[R/K]xx[F/L]xxx) amphiphilic motif (Zhang et al. 2015). Putative amino acids involved in  
322 octopamine binding are extended through a 222 amino acids region between W106 and Y327.

### 323 **Vd\_TAR1 protein**

324 Vd\_TAR1 encoded for a 369 amino acids protein. Vd\_TAR1 was aligned to the acari tyramine  
325 receptors more similar to the tyramine receptor of *R. microplus* (CAA09335), in which  
326 mutations associated with resistance to amitraz have been described (Kumar 2019). As with  
327 Vd\_Oct $\alpha_2$ R and Vd\_Oct $\beta_2$ R, the regions corresponding to the predicted seven helices in the  
328 tertiary structure of the proteins are conserved among species (Fig. 2C). The modelling of the  
329 three-dimensional structure Vd\_TAR1 also showed the described structure for GPCR: seven  
330 hydrophobic transmembrane domains and six hydrophilic loops (Fig. 3B). Like in other TAR1  
331 receptors, the third intracellular loop of Vd\_TAR1 is longer than that in Oct $\beta_2$ Rs. The  
332 percentage of identity between Vd\_TAR1 and the tyramine receptors from other acari species is  
333 94 % for *T. mercedesae*, 61 % for *R. microplus* and for *I. scapularis*, and 56 % for *G.*  
334 *occidentalis*.

### 335 **Vd\_oct $\alpha_2r$ , Vd\_oct $\beta_2r$ and Vd\_tar1 genes**

336 The cDNA of Vd\_oct $\alpha_2r$ , Vd\_oct $\beta_2r$  and Vd\_tar1 were obtained by RT-PCR, using as template  
337 the same RNA samples used for transcriptomics. Sequencing of the ORFs showed a full identity  
338 of these cDNAs with XM\_022813586, XM\_022808967 and XM\_022814594, corresponding to  
339 the mRNA of Vd\_Oct $\alpha_2$ R, Vd\_Oct $\beta_2$ R, and Vd\_TAR1, respectively.

340 The ORF of Vd\_oct $\alpha_2r$  has a length of 1,599 bp, and the full gene is 155,562 bp long. The  
341 Vd\_oct $\alpha_2r$  gene comprises nine exons and eight introns (Fig. 5A). The 5'UTR is extended along

342 Exon 1, Exon 2 and Exon 3. The start codon (position 3,746 at the mRNA) is sited in Exon 4.  
343 The stop codon (position 5,344 at the mRNA) and the 3'UTR are in the Exon 9, the largest  
344 exon. The length of all the exons and introns of *Vd\_oct $\alpha$ 2r* is shown in Fig. 5A.

345 The lengths of *Vd\_oct $\beta$ 2r* ORF, mRNA, and full gene sequences are 1,101 bp, 11,863 bp, and  
346 141,186 bp, respectively. The *Vd\_oct $\beta$ 2r* gene comprises two exons and one intron (Fig. 5B).  
347 Exon 1 contains the 5'UTR and the start codon (position 4,507 at the mRNA), and Exon 2  
348 contains the stop codon (position 5,607 at the mRNA) and the 3'UTR. Between Exon 1 and  
349 Exon 2 there is a long intron of 129,323 bp (Fig. 5B).

350 The *Vd\_tar1* gene has a length of 22,226 bp, transcribed into an mRNA of 2,788 bp in which an  
351 ORF of 1,110 bp is found. The *Vd\_tar1* gene comprises 4 exons and 3 introns (Fig. 5C). The  
352 5'UTR is extended along Exon 1 and Exon 2. The start codon (position 1,162 at the mRNA) is  
353 sited in Exon 2. The stop codon (position 2,769 at the mRNA) and the 3'UTR are in the Exon 4.  
354 The length of all the exons and introns of *Vd\_tar1* is shown in Fig. 5C.

### 355 ***Vd\_oct $\beta$ 2r* and *Vd\_tar1* sequences in *V. destructor* mites susceptible to amitraz**

356 Total RNA was isolated from pools of five to ten *V. destructor* adult females collected in Iran,  
357 New Zealand, Spain and the UK between 2016 and 2019 from colonies without amitraz  
358 treatment. As mutations associated with the resistance to amitraz has been described in Oct $\beta$ R  
359 and TAR1 receptors, RNA from these susceptible mites was reverse transcribed into cDNA to  
360 amplify the full length of *Vd\_oct $\beta$ 2r* and *Vd\_tar1* ORFs. The sequencing of *Vd\_oct $\beta$ 2r* and  
361 *Vd\_tar1* ORFs of mites from these countries showed identical sequences to those previously  
362 identified as wild-type in this paper (XM\_022813586 and XM\_022814594, respectively).

### 363 ***Vd\_oct $\beta$ 2r* N87S mutation**

364 We identified a single point mutation in *Vd\_oct $\beta$ 2r* gene (substitution of A to G at nucleotide  
365 260 of the ORF) in mites extracted alive from the brood, right after finishing the treatment with  
366 amitraz, in colonies of apiary DTRA (Isère department, France), that reported failure of this

367 treatment. This mutation results in an asparagine (AAT) to serine (AGT) substitution at position  
368 87 of the *Vd\_Octβ<sub>2</sub>R* protein (N87S) (Fig. 6A). To validate this result, total DNA was isolated  
369 from 24 individual mites collected in 3 colonies from the same apiary. The genomic region  
370 comprising the mutation was amplified and sequenced. All sequenced mites showed the N87S  
371 mutation (Table 1). The same analysis was carried out with mites from the apiaries MAP (Loire  
372 department) and MHRA (Isère department), where the treatment with amitraz also failed. The  
373 mutation was present in 75 % of the mites from MAP apiary, and in 71 % of the mites from the  
374 MHRA apiary (Table 1). In colonies MM16 and J11 (both located in apiaries at Puy-de-Dôme  
375 department) the mutation N87S was detected in 77 and 57 % of the mites, respectively (Table  
376 1). Further analysis showed that the efficacy of amitraz treatment was 92 % in colony MM16  
377 and 77 % in J11. The occurrence of this mutation was also studied in three apiaries from nearby  
378 departments in which amitraz was not used the year before sampling. Apiaries VB (Alpes-de-  
379 Haute-Provence department), AmA (Maine-et-Loire department) and DE (Drôme) were all  
380 treated with oxalic acid. None of the mites from VB and AmA carried the mutation N87S while  
381 26 % of the mites from DE were mutants (Table 1). Altogether, these data show circumstantial  
382 evidence that there is an association between the mutation N87S and amitraz treatment failure.

383 The ORF of *Vd\_tar1* was also sequenced in pools of mites collected from all French apiaries  
384 analysed in this study. None of the analysed mites showed any change in the sequence when  
385 compared with the wild-type *Vd\_tar1*.

### 386 **Y215H mutation**

387 In the U.S., a state apiary inspector reported the failure of the amitraz treatment in some  
388 colonies from New Jersey in 2018 (Styles, Personal communication). The *Vd\_octβ<sub>2</sub>r* and  
389 *Vd\_tar1* gene sequences were examined in mites collected from four of these colonies. No  
390 mutations were detected in *Vd\_tar1* gene and the mutation N87S, identified in French samples,  
391 was also not detected. However, a new single point mutation was identified in the *Vd\_octβ<sub>2</sub>r*  
392 gene from mites collected from the four colonies. The substitution of T to C at position 643 of  
393 the ORF results in a tyrosine (TAT) to histidine (CAT) substitution at position 215 of the



394 Vd\_Oct $\beta$ <sub>2</sub>R protein (Y215H) (Fig. 6B). This mutation was detected in 50 to 96 % of the mites  
395 sequenced from these colonies (Fig. 7, Table S1).

396 In order to gather data regarding the presence of the mutation Y215H in New Jersey from  
397 previous years, mites collected in 2016 from different colonies in this state were also sequenced.  
398 We did not detect this mutation in any of the colonies analysed (Fig. 7, Table S1).

399 Since the presence of the Y215H mutation seemed related with the reduced susceptibility to  
400 amitraz, we analyzed mite samples obtained from a BIP project evaluating the efficacy to  
401 Apivar<sup>®</sup> in Oregon and Michigan in 2018. These trials were suggestive of amitraz treatment  
402 failure (Nathalie Steinhauer, personal communication). Samples of phoretic *V. destructor* mites  
403 were collected from bees sampled from colonies while being treated with Apivar<sup>®</sup>. The Y215H  
404 mutation was detected in 88 and 96 % of the mites from the two colonies we examined that  
405 were treated with Apivar<sup>®</sup> in Oregon, and in the 94 and 90 % of the mites from the two colonies  
406 treated with Apivar<sup>®</sup> in Michigan (Fig. 7, Table S1). Colonies from the same apiaries but treated  
407 with thymol instead of Apivar<sup>®</sup> were also analyzed. The Y215H mutation was present in 96 and  
408 100 % of the mites collected in the two colonies from Oregon and the same frequencies were  
409 also recorded in the two colonies from Michigan (Table S1). On the other hand, mites collected  
410 from these two states before 2018 (Millán-Leiva et al. 2021a) were also sequenced. The  
411 mutation was found but at much lower frequency, suggesting that the mutation is a relatively  
412 recent event (Fig. 7, Table S1).

413 To estimate when the mutation first evolved in the U.S. population, we compared the  
414 presence of Y215H in samples collected in 2020 with samples collected in previous years in  
415 several U.S. states (Millán-Leiva et al. 2021a). Results from Delaware, Massachusetts, Montana  
416 and Pennsylvania showed that the mutation was practically non-existent in 2016 but its  
417 incidence has increased since (Fig. 7, Table S1).

418 **Diagnostic assay**

419 Two high throughput allelic discrimination assays based on TaqMan<sup>®</sup> were developed to enable  
420 rapid and accurate genotyping of N87S and Y215H mutations in individual mites. For each real-  
421 time PCR assay, we designed two fluorescent labelled probes to discriminate between wild-type  
422 and mutant alleles. The probes selective for N87 or Y215 wild-type alleles were labelled with  
423 VIC<sup>®</sup> while the others, selective for S87 or H215 alleles, were labelled with 6FAM<sup>™</sup>.  
424 Therefore, an increase in VIC<sup>®</sup> fluorescence indicates the presence of the wild-type allele, while  
425 an increase in 6FAM<sup>™</sup> fluorescence indicates the presence of the mutant allele. An  
426 intermediate increase in the fluorescence of both dyes indicates that the mite is heterozygous for  
427 the mutation. Twenty-four mites in which the nucleotide at each of the mutation sites of  
428 *Vd\_octβ<sub>2r</sub>* was known by previous sequencing were genotyped by TaqMan<sup>®</sup>. The results  
429 showed a perfect correlation between data from sequencing and genotyping. Genotyped mites  
430 were either homozygous for the wild-type allele (N87 or Y215), the mutant allele (S87 or  
431 H215), or heterozygous for each mutation (Fig. 8).

432

### 433 **DISCUSSION AND CONCLUSION**

434 Here we identified two amino acid substitutions, located in the β-adrenergic octopamine  
435 receptor of *V. destructor*, that seem to be associated with field treatment failures using amitraz  
436 in samples collected in France and the U.S. Our data also show circumstantial evidence of an  
437 independent evolution of resistance in both locations.

438 Amitraz is a formamidine that has been widely used as an acaricide since its discovery back in  
439 1972 (Harrison et al. 1972). Nowadays, it is one of the main alternatives for controlling  
440 varroosis worldwide. This compound mimics the action of the neurotransmitters octopamine  
441 and tyramine and blocks their receptors (Hollingworth and Lund 1982). Therefore, it is likely  
442 that modifications in key sites of the octopamine or tyramine receptors would be associated with  
443 the treatment failures reported by beekeepers after treatments with amitraz-based acaricides.

444 A joint analysis of transcriptomic (BioProject ID PRJNA531374) and genomic data (Techer et  
445 al. 2019), alongside with data available in public databases, allowed the characterization of  
446 proteins from three different classes of receptors in this mite: an  $\alpha$ -adrenergic-like octopamine  
447 receptor (Vd\_Oct $\alpha_2$ R), a  $\beta$ -adrenergic-like octopamine receptor (Vd\_Oct $\beta_2$ R) and a tyramine  
448 type 1 receptor (Vd\_TAR1). A more in-depth *in silico* study of the secondary and tertiary  
449 structures of these proteins showed that they have structural features typical of the superfamily  
450 of G-protein coupled receptors, such as the seven transmembrane domains and the classic  
451 distribution of extracellular and intracellular loops (Finetti et al. 2021). Moreover, the  
452 occurrence of highly conserved residues and several sequence motifs common to  $\alpha$ - and  $\beta$ -  
453 adrenergic octopamine receptors in Vd\_Oct $\alpha$ R and Vd\_Oct $\beta$ R, confirmed the correct  
454 identification and classification of these proteins as octopamine receptors in *V. destructor*. It  
455 was once thought that amitraz only interacts with octopamine receptors (OAR). However,  
456 during that time, tyramine type 1 receptors have been wrongly classified as OAR (Chen et al.  
457 2007). Later, this receptor was classified as Oct/TyrR (Baron et al. 2015) and recently, tyramine  
458 type 1 receptor was finally classified as TAR (Farooqui 2012; Finetti et al. 2021). However, as  
459 this is a recent change in the classification, it is still not updated in public databases, that  
460 maintain erroneous annotations, leading to confusion when trying to identify and classify this  
461 family of receptors. This is the case of *V. destructor*, in which Vd\_TAR1 (XP\_02270329) is  
462 described as octopamine receptor-like, actually being a tyramine receptor, as we have  
463 thoroughly described in this study.

464 Resistance to amitraz in *Varroa* have been reported in populations from different locations  
465 around the world, such as the U.S. (Elzen et al. 1999; Elzen et al. 2000; Rinkevich 2020),  
466 Mexico (Rodríguez-Dehaibes et al. 2005), Argentina (Maggi et al. 2010), the Czech Republic  
467 (Kamler et al. 2016) and France (Almecija et al. 2020). In addition to these publications,  
468 anecdotal reports of reduced amitraz efficacy are widely discussed among beekeepers  
469 (Rinkevich 2020). However, until now, the mechanism causing this lack of efficacy was  
470 unknown.

471 The mechanism of resistance to amitraz has been thoroughly studied in the cattle tick *R.*  
472 *microplus* (Baxter and Barker 1999; Chen et al. 2007; Corley et al. 2013; Baron et al. 2015;  
473 Koh-Tan et al. 2016; Jonsson et al. 2018). In this species, the resistance detected in the field has  
474 been associated with polymorphisms in the octopamine and tyramine receptors, suggesting that  
475 target site insensitivity is the most common mechanism of resistance to amitraz. Chen et al.  
476 (2007) found two amino acid substitutions (T8P and L22S) in the tyramine receptor gene that  
477 were only present in American strains highly resistant to amitraz. Further analysis by Baron et  
478 al. (2015) supported the association of these two SNPs with the resistance in field samples  
479 collected in South Africa. However, previous analysis of the same gene with samples collected  
480 in Australia did not find any SNPs differentiating susceptible from resistant strains (Baxter and  
481 Barker 1999). In an attempt to address this issue, Corley et al. (2013) widen the scope of the  
482 analysis to other octopamine receptors using the same amitraz-resistant Ultimo strain analysed  
483 by Baxter and Barker. They found an increased frequency of the mutation I61F in the  $\beta$ -  
484 adrenergic octopamine receptor (RmBAOR) providing circumstantial support for associating  
485 this mutation with the resistance to amitraz in the Ultimo strain. Supporting this association, an  
486 I45F mutant of *Bombyx mori* OAR2 (equivalent to I61F in RmBAOR) showed reduced  
487 sensitivity to the amitraz metabolite DPMF ( $N^2$ -(2,4-Dimethylphenyl)- $N^1$ -methylformamidine)  
488 in HEK-293 cells (Takata et al. 2020). In a different study, cell lines derived from acaricide-  
489 resistant *R. microplus* colonies from Colombia contained a 36 bp duplication in the RmBAOR  
490 gene leading to a 12 amino acid insertion in the first transmembrane domain of the protein  
491 (Koh-Tan et al. 2016). Further analyses of resistant *R. microplus* from Brazil, Mexico,  
492 Australia, Thailand and South Africa supported the association of I61F with the resistance, but  
493 also described novel SPNs in the RmBAOR associated with amitraz resistance in specific  
494 populations (Jonsson et al. 2018).

495 To date, there is no reported association between mutations in  $\alpha$ -adrenergic octopamine  
496 receptors and resistance to amitraz. Therefore, we analysed Vd\_TAR1 and Vd\_Oct $\beta$ <sub>2</sub>R, the  
497 receptors of *V. destructor* phylogenetically closer to those of *R. microplus* reporting

498 polymorphisms associated with amitraz resistance. None of the mutations described in *R.*  
499 *microplus* were found in the *V. destructor* samples analysed in this study. However, we did  
500 identify two novel non-synonymous substitutions in the *Vd\_octβr* gene with a differential  
501 geographical distribution. A substitution of asparagine 87 to serine (N87S) associated with  
502 treatment failures in France, and a substitution of tyrosine 215 to histidine (Y215H) in samples  
503 collected across the U.S. from colonies reporting low amitraz efficacy. None of the samples  
504 analysed in this study were collected as part of a structured sampling strategy designed to  
505 elucidate the mechanism of resistance to amitraz. Rather, most of them were part of projects,  
506 experiments or surveys conducted to validate previous reports of treatment failures. After a  
507 careful case-by-case analysis of the sampling and treatment history, it is possible to draw  
508 conclusions on whether these mutations are associated with the resistance to amitraz. In the case  
509 of samples collected in France, when the sampling was conducted after finishing the treatment  
510 with amitraz (Table 1), a significant number of mites were mutants for N87S (always above 50  
511 %), showing an association with the efficacy observed in the field. On the other hand, the  
512 samples collected from colonies not exposed to amitraz at least the year before the sample  
513 collection were mostly wild-type. This suggests that amitraz is exerting a significant selection  
514 pressure, favouring the prevalence of N87S mutants in the populations after an intensive  
515 treatment regime for many years. In the U.S., the samples were collected as part of different  
516 projects and screening efforts using different sampling approaches. In these cases, whenever the  
517 mites (phoretic) were collected after finishing the treatment with amitraz (NJ-M- NJ-M-001,  
518 NJ-M-002, NJ-M-008, NJ-EP-2) or when the treatment was still ongoing (OR-AV01, OR-  
519 AV02, MI-22, MI-33), the frequency of mutants was very high (Table S1), indicating an  
520 association between the presence of the mutation Y215H and the survival after exposure.  
521 However, the samples collected from other colonies (OR-AL38, OR-AL51, MI-56, MI-58),  
522 taking part in the same field assay in Oregon and Michigan but treated with thymol, also  
523 showed a high frequency of mutant mites. This may be explained considering that amitraz has  
524 been used intensively for long time in these locations. Thus, given the high movement of mites  
525 within apiaries (Kulhanek et al. 2021), it is possible that a significant part of the population was

526 already mutant before starting the field trials in 2018. The historical data gathered after the  
527 analysis of samples collected in 2016 and 2017 also supports this idea. Our data show that the  
528 mutation was nearly absent in the samples collected in several states in 2016, with only one  
529 sample with mutants in Michigan (MI-09). Yet, in 2017, although some samples were still  
530 completely wild-type, many of them show that the mutation was present in a significant number  
531 of mites. Hence, it is reasonable to think that in 2018, following the same treatment regime with  
532 amitraz, the frequency of mutants -e.g. resistant mites- would predominate (Table S1).

533 The joint analysis of the data also suggests that the resistance have evolved independently at  
534 both locations. The mutation N87S was detected only in mites collected in France while Y215H  
535 was detected only in the mites collected in the U.S. This result is yet another example of the  
536 capacity of this species to evolve resistance to the same acaricide via multiple independent  
537 pathways. This was already described for the resistance to pyrethroids based-acaricides. In  
538 Europe mites carry mostly the mutation L925V in the VGSC, while those from the U.S. carry  
539 the mutations L925M and L925I (González-Cabrera et al. 2013; González-Cabrera et al. 2016;  
540 González-Cabrera et al. 2018; Millán-Leiva et al. 2021a). A more recent study also evidenced  
541 that this was the result of a parallel and independent evolution process (Millán-Leiva et al.  
542 2021b). Following the same rationale, the different mutations associated with the resistance of  
543 *R. microplus* to amitraz that evolved in different locations, in different receptor proteins and also  
544 in different residues of the same protein (Chen et al. 2007; Corley et al. 2013; Koh-Tan et al.  
545 2016; Jonsson et al. 2018), are a very good example of the many possibilities that can be found  
546 in *V. destructor*. As we have screened a relatively small number of samples, from few locations,  
547 a larger screening effort is called for to draw a more accurate and complete picture of the  
548 situation.

549 A thorough *in silico* analysis of the  $\beta$ -octopamine receptor of *Schistocerca gregaria* showed that  
550 the nonpolar residues of the transmembrane regions are buried in the receptor core to form a  
551 hydrophobic pocket (active pocket) that is closed to the extracellular region and surrounded by  
552 the transmembrane domain (Lu et al. 2017). According to the *in silico* model, asparagine 87 is

553 located at the end of helix II of Vd\_Oct $\beta$ <sub>2</sub>R (Fig. 3), positioned near to the residues predicted as  
554 the putative binding site for octopamine. In the N87S mutation, the mutant residue is smaller  
555 and more hydrophobic (N -0.78; S -0.18) (Eisenberg et al. 1984) than the wild-type residue and  
556 this might lead to loss of hydrogen bonds and/or disturb the correct folding of the protein. Since  
557 this mutation is in a domain that is important for the main activity of the receptor, it might  
558 somehow disturb its function. A more targeted study found out that in *Sitophilus oryzae* amitraz  
559 and octopamine might not share the same binding site, although the two sites were close to one  
560 another (Braza et al. 2019). Docking of amitraz to *S. oryzae* tyramine receptor showed eight  
561 residues of the receptor closely interacting with this ligand. One of these amino acids was  
562 Asn91, corresponding to Asn87 in *V. destructor*. When this position was examined across  
563 species, it was found that this residue was totally conserved in both,  $\beta$ -adrenergic octopamine  
564 and tyramine receptors (Fig. S1A). On the other hand, in  $\alpha$ -adrenergic-like octopamine  
565 receptors, this position shows a serine residue instead of an asparagine, indicating a possible  
566 different interaction of amitraz with Oct $\alpha$ R<sub>s</sub> in comparison with Oct $\beta$ R<sub>s</sub> and TAR1s. Indeed,  
567 Kita et al. (2017) showed that the potency of amitraz and its metabolite DPMF to activate *B.*  
568 *mori* octopamine receptors was 347- and 2274-fold higher in  $\beta$ -adrenergic-like octopamine  
569 receptors than in  $\alpha$ -adrenergic-like octopamine receptors, respectively. Additionally, based on  
570 the consensus sequence for N-linked glycosylation (NXT/S), residue N87 is predicted as a  
571 putative N-glycosylation site in Vd\_Oct $\beta$ <sub>2</sub>R. N-glycosylation has been shown to be important  
572 for many GPCRs especially in correct folding, surface expression, signalling, and dimerization  
573 (Nørskov-Lauritsen and Bräuner-Osborne 2015; Patwardhan et al. 2021). Actually, it has been  
574 reported that N-glycosylation of the  $\alpha_{1D}$ -adrenergic receptor is required for correct trafficking  
575 and complete translation of a nascent, functional receptor (Janezic et al. 2020), and that the N-  
576 glycosylation of the  $\beta_2$ -adrenergic receptor regulates its function by influencing receptor  
577 dimerization (Li et al. 2017). Therefore, if the asparagine at position 87 of the Vd\_Oct $\beta$ <sub>2</sub>R is  
578 indeed a N-glycosylation site, its substitution for a serine residue may affect the integrity and  
579 functionality of this receptor.

580 The mutation Y215H is sited in the fifth transmembrane segment of the Vd\_Oct $\beta$ 2R (Fig. 4). In  
581 this case, the wild-type residue is more hydrophobic than the mutant residue (Y 0.26; H -0.4)  
582 (Eisenberg et al. 1984). After *in silico* analysis, the prediction results based on secondary  
583 structure showed a negative effect of the substitution (score +50 with SNAP2; 100 %  
584 probability of damage with PolyPhen2). The analysis of the tertiary structure of the mutant  
585 protein indicated a decrease of the stability (Reliable index: 8 with I-MUTANT), and predicted  
586 that the hydrophobic interactions, either in the core of the protein or on the surface, would be  
587 lost (HOPE). Therefore, it seems that the change from tyrosine to histidine in this domain of the  
588 protein could seriously alter the conformation of the helix and its surroundings, which can affect  
589 the interaction of the receptor with the ligand. This hypothesis is supported by the conservation  
590 of the tyrosine residue at this position of the protein among all species analysed in this study.  
591 (Fig S1B).

592 Amitraz exerts its acaricidal action as an agonist of octopamine. In invertebrates, octopamine  
593 acts as neurotransmitter, neuromodulator, and neurohormone, playing a fundamental role on  
594 physiological processes (Farooqui 2007). By binding to G-coupled receptors on the surface of  
595 neurons and other cells, octopamine functions as neurotransmitter affecting diverse behaviours  
596 such as excitation, aggression and egg laying (Roeder 2005). In ticks, sublethal and behaviour  
597 effects of amitraz are considered more important than lethality in the mode of action. It has been  
598 shown that amitraz causes hyperactivity, leg waving, detaching behaviour and inhibition of the  
599 reproduction (Page 2008). Therefore, the effect of amitraz goes beyond killing like a poison; it  
600 is effective by acting as a behaviour disruptor, inhibiting the mites' ability to remain attached to  
601 the bees before killing them. This suggests that lab bioassays that only measure LD<sub>50</sub> may  
602 underestimate resistance as it would express under field conditions. Thus, looking for  
603 associations between the presence of mutations and the survival of mites in colonies treated  
604 under field conditions, is perhaps a more appropriate approach to elucidate the mechanism of  
605 resistance to products that cause behavioural changes that result in death, rather than cause  
606 death directly.



607 Our findings supports the association of the mutations N87S and Y215H in the  $\beta$ -adrenergic-  
608 like octopamine receptor of *V. destructor* with the resistance to amitraz reported in the field.  
609 Future research is needed to show a causal relationship between these mutations and the  
610 evolution of resistance to amitraz, but these tests must account for the behavioural changes  
611 induced by amitraz. Moreover, data from functional analysis via electrophysiology and other  
612 approaches will help to fully characterise the interaction of amitraz with wild-type and mutant  
613 receptors.

614 The current status in the management of *V. destructor* shows i) a widespread resistance to  
615 pyrethroids (Kim et al. 2009; Bak et al. 2012; González-Cabrera et al. 2016; Kamler et al. 2016;  
616 González-Cabrera et al. 2018; Millán-Leiva et al. 2021a); ii) increasing cases of failures after  
617 treatments with coumaphos (Elzen and Westervelt 2002; Maggi et al. 2009; Maggi et al. 2011);  
618 iii) and the overreliance of beekeepers on amitraz (Haber et al. 2019), which may favour the  
619 evolution of resistance to this acaricide. In this scenario, monitoring the resistance to acaricidal  
620 compounds is crucial to decide whether a given treatment is likely to be successful, as well as to  
621 avoid selection pressures with treatments that can lead to an increase of mites carrying  
622 mutations conferring resistance. To help on this endeavour, we have developed high throughput  
623 allelic discrimination assays based on TaqMan<sup>®</sup> for detecting N87S and Y215H mutations in the  
624 Vd\_Oct $\beta$ <sub>2</sub>R, as was previously implemented to detect mutations in the *V. destructor* VGSC  
625 associated with resistance to pyrethroids (González-Cabrera et al. 2013; González-Cabrera et al.  
626 2016). This assay is relatively cheap, fast, robust and capable of accurately genotype individual  
627 mites in poor quality samples. Therefore, the implementation of allelic discrimination assays  
628 like those described in this study will be especially suited towards determining the distribution  
629 and frequency of mutations associated to resistances in local Varroa populations. This  
630 information would be very valuable for designing a more rational control of Varroa, selecting  
631 each time the best acaricide for their apiaries.

632

633 **REFERENCES**

- 634 Adzhubei IA et al. (2010) A method and server for predicting damaging missense mutations.  
635 Nat Methods 7:248-249. doi:10.1038/nmeth0410-248
- 636 Afonina I, Zivarts M, Kutuyavin I, Lukhtanov E, Gamper H, Meyer R (1997) Efficient priming  
637 of PCR with short oligonucleotides conjugated to a minor groove binder. Nucleic Acids  
638 Res 25:2657 - 2660
- 639 Almecija G, Poirot B, Cochard P, Suppo C (2020) Inventory of *Varroa destructor* susceptibility  
640 to amitraz and tau-fluvalinate in France. Exp Appl Acarol. doi:10.1007/s10493-020-  
641 00535-w
- 642 Aronstein KA, Saldivar E, Vega R, Westmiller S, Douglas AE (2012) How *Varroa* parasitism  
643 affects the immunological and nutritional status of the honey bee, *Apis mellifera*. Insects  
644 3:601-615. doi:10.3390/insects3030601
- 645 Bak B, Wilde J, Siuda M (2012) Characteristics of north-eastern population of *Varroa*  
646 *destructor* resistant to synthetic pyrethroids. Med Weter 68:603-606
- 647 Baron S, van der Merwe NA, Madder M, Maritz-Olivier C (2015) SNP analysis infers that  
648 recombination is involved in the evolution of amitraz resistance in *Rhipicephalus*  
649 *microplus*. Plos One 10:e0131341. doi:10.1371/journal.pone.0131341
- 650 Baxter GD, Barker SC (1999) Isolation of a cDNA for an octopamine-like, G-protein coupled  
651 receptor from the cattle tick, *Boophilus microplus*. Insect Biochem Mol Biol 29:461-  
652 467. doi:10.1016/S0965-1748(99)00023-5
- 653 Beaurepaire AL, Truong TA, Fajardo AC, Dinh TQ, Cervancia C, Moritz RF (2015) Host  
654 specificity in the honeybee parasitic mite, *Varroa* spp. in *Apis mellifera* and *Apis*  
655 *cerana*. Plos One 10:e0135103. doi:10.1371/journal.pone.0135103
- 656 Boecking O, Genersch E (2008) Varroosis - the ongoing crisis in bee keeping. Journal Fur  
657 Verbraucherschutz Und Lebensmittelsicherheit-Journal of Consumer Protection and  
658 Food Safety 3:221-228. doi:10.1007/s00003-008-0331-y
- 659 Bonzini S, Tremolada P, Bernardinelli I, Colombo M, Vighi M (2011) Predicting pesticide fate  
660 in the hive (part 1): experimentally determined  $\tau$ -fluvalinate residues in bees, honey and  
661 wax. Apidologie 42:378-390
- 662 Braza MKE, Gazmen JDN, Yu ET, Nellas RB (2019) Ligand-induced conformational dynamics  
663 of a tyramine receptor from *Sitophilus oryzae*. Scientific reports 9:16275.  
664 doi:10.1038/s41598-019-52478-x
- 665 Calatayud-Vernich P, Calatayud F, Simó E, Picó Y (2018) Pesticide residues in honey bees,  
666 pollen and beeswax: Assessing beehive exposure. Environmental Pollution 241:106-  
667 114. doi:10.1016/j.envpol.2018.05.062
- 668 Chen AC, He H, Davey RB (2007) Mutations in a putative octopamine receptor gene in  
669 amitraz-resistant cattle ticks. Veterinary Parasitology 148:379-383
- 670 Corley SW, Jonsson NN, Piper EK, Cutulle C, Stear MJ, Seddon JM (2013) Mutation in the  
671 RmbetaAOR gene is associated with amitraz resistance in the cattle tick *Rhipicephalus*  
672 *microplus*. Proc Natl Acad Sci U S A 110:16772-16777. doi:10.1073/pnas.1309072110
- 673 Desneux N, Decourtye A, Delpuech JM (2007) The sublethal effects of pesticides on beneficial  
674 arthropods. Annual Review of Entomology 52:81-106.  
675 doi:10.1146/annurev.ento.52.110405.091440

- 676 Dietemann V et al. (2013) Standard methods for varroa research. In: Dietemann V, Ellis JD,  
677 Neumann P (eds) The COLOSS BEEBOOK, Volume II: standard methods for *Apis*  
678 *mellifera* pest and pathogen research. Journal of Apicultural Research 52(1):  
679 <http://dx.doi.org/10.3896/IBRA.1.52.1.09>, vol 52. vol 1. doi:10.3896/IBRA.1.52.1.09
- 680 Eisenberg D, Schwarz E, Komaromy M, Wall R (1984) Analysis of membrane and surface  
681 protein sequences with the hydrophobic moment plot. J Mol Biol 179:125-142.  
682 doi:10.1016/0022-2836(84)90309-7
- 683 Elzen PJ, Baxter JR, Spivak M, Wilson WT (1999) Amitraz resistance in varroa: New discovery  
684 in North America. Am Bee J 139:362-362
- 685 Elzen PJ, Baxter JR, Spivak M, Wilson WT (2000) Control of *Varroa jacobsoni* Oud. resistant  
686 to fluvalinate and amitraz using coumaphos. Apidologie 31:437-441.  
687 doi:10.1051/apido:2000134
- 688 Elzen PJ, Eischen FA, Baxter JB, Pettis J, Elzen GW, Wilson WT (1998) Fluvalinate resistance  
689 in *Varroa jacobsoni* from several geographic locations. Am Bee J 138:674-676
- 690 Elzen PJ, Westervelt D (2002) Detection of coumaphos resistance in *Varroa destructor* in  
691 Florida. Am Bee J 142:291-292
- 692 EMA (2010) Guideline on veterinary medicinal products controlling *Varroa destructor*  
693 parasitosis in bees. [https://www.ema.europa.eu/en/documents/scientific-](https://www.ema.europa.eu/en/documents/scientific-guideline/guideline-veterinary-medicinal-products-controlling-varroa-destructor-parasitosis-bees_en.pdf)  
694 [guideline/guideline-veterinary-medicinal-products-controlling-varroa-destructor-](https://www.ema.europa.eu/en/documents/scientific-guideline/guideline-veterinary-medicinal-products-controlling-varroa-destructor-parasitosis-bees_en.pdf)  
695 [parasitosis-bees\\_en.pdf](https://www.ema.europa.eu/en/documents/scientific-guideline/guideline-veterinary-medicinal-products-controlling-varroa-destructor-parasitosis-bees_en.pdf). Accessed 16 July 2021 2021
- 696 Farooqui T (2007) Octopamine-mediated neuromodulation of insect senses. Neurochem Res  
697 32:1511-1529. doi:10.1007/s11064-007-9344-7
- 698 Farooqui T (2012) Review of octopamine in insect nervous systems. Open Access Insect  
699 Physiology. doi:10.2147/oaip.S20911
- 700 Feyereisen R, Dermauw W, Van Leeuwen T (2015) Genotype to phenotype, the molecular and  
701 physiological dimensions of resistance in arthropods. Pestic Biochem Physiol 121:61-  
702 77. doi:10.1016/j.pestbp.2015.01.004
- 703 Filipek S (2019) Molecular switches in GPCRs. Curr Opin Struct Biol 55:114-120.  
704 doi:10.1016/j.sbi.2019.03.017
- 705 Finetti L, Roeder T, Calo G, Bernacchia G (2021) The Insect Type 1 Tyramine Receptors: From  
706 Structure to Behavior. Insects 12. doi:10.3390/insects12040315
- 707 González-Cabrera J et al. (2018) A single mutation is driving resistance to pyrethroids in  
708 European populations of the parasitic mite, *Varroa destructor*. Journal of Pest Science  
709 91:1137-1144. doi:10.1007/s10340-018-0968-y
- 710 González-Cabrera J, Davies TGE, Field LM, Kennedy PJ, Williamson MS (2013) An amino  
711 acid substitution (L925V) associated with resistance to pyrethroids in *Varroa*  
712 *destructor*. Plos One 8:e82941. doi:10.1371/journal.pone.0082941
- 713 González-Cabrera J et al. (2016) Novel Mutations in the voltage-gated sodium channel of  
714 pyrethroid-resistant *Varroa destructor* populations from the Southeastern USA. Plos  
715 One 11:e0155332. doi:10.1371/journal.pone.0155332

- 716 Gracia-Salinas MJ, Ferrer-Dufol M, Latorre-Castro E, Monero-Manera C, Castillo-Hernández  
717 JA, Lucientes-Curd J, Peribanez-López MA (2006) Detection of fluvalinate resistance  
718 in *Varroa destructor* in Spanish apiaries. J Apicult Res 45:101-105
- 719 Haber AI, Steinhauer NA, vanEngelsdorp D (2019) Use of chemical and nonchemical methods  
720 for the control of *Varroa destructor* (Acari: Varroidae) and associated winter colony  
721 losses in U.S. beekeeping operations. J Econ Entomol 112:1509-1525.  
722 doi:10.1093/jee/toz088
- 723 Harrison IR, Kozlik A, McCarthy JF, Palmer BH, Wakerley SB, Watkins TI, Weighton DM  
724 (1972) 1,5-di-(2,4-dimethylphenyl)-3-methyl-1,3,5-triazapenta-1,4-diene, a new  
725 acaricide active against strains of mites resistant to organophosphorus and bridged  
726 diphenyl compounds. Pesticide Science 3:679-680. doi:10.1002/ps.2780030603
- 727 Hecht M, Bromberg Y, Rost B (2015) Better prediction of functional effects for sequence  
728 variants. BMC Genomics 16:S1. doi:10.1186/1471-2164-16-S8-S1
- 729 Hollingworth RM, Lund AE (1982) Biological and neurotoxic effects of amidine pesticides. In:  
730 Coats JR (ed) Insecticide Mode of Action. Academic Press, New York, pp 198-227
- 731 Hubert J, Nesvorna M, Kamler M, Kopecky J, Tyl J, Titera D, Stara J (2014) Point mutations in  
732 the sodium channel gene conferring tau-fluvalinate resistance in *Varroa destructor*. Pest  
733 Manag Sci 70:889-894. doi:10.1002/ps.3679
- 734 Janezic EM et al. (2020) N-glycosylation of alpha1D-adrenergic receptor N-terminal domain is  
735 required for correct trafficking, function, and biogenesis. Scientific reports 10:7209.  
736 doi:10.1038/s41598-020-64102-4
- 737 Jonsson NN, Klafke G, Corley SW, Tidwell J, Berry CM, Koh-Tan HC (2018) Molecular  
738 biology of amitraz resistance in cattle ticks of the genus *Rhipicephalus*. Front Biosci  
739 (Landmark Ed) 23:796-810. doi:10.2741/4617
- 740 Kall L, Krogh A, Sonnhammer EL (2004) A combined transmembrane topology and signal  
741 peptide prediction method. J Mol Biol 338:1027-1036. doi:10.1016/j.jmb.2004.03.016
- 742 Kamler M, Nesvorna M, Stara J, Erban T, Hubert J (2016) Comparison of tau-fluvalinate,  
743 acrinathrin, and amitraz effects on susceptible and resistant populations of *Varroa*  
744 *destructor* in a vial test. Exp Appl Acarol 69:1-9. doi:10.1007/s10493-016-0023-8
- 745 Kearse M et al. (2012) Geneious Basic: an integrated and extendable desktop software platform  
746 for the organization and analysis of sequence data. Bioinformatics 28:1647-1649.  
747 doi:10.1093/bioinformatics/bts199
- 748 Kim W et al. (2009) A geographical polymorphism in a Voltage-Gated Sodium Channel gene in  
749 the mite, *Varroa destructor*, from Korea. Korean Journal of Apiculture 24:159-165
- 750 Kita T et al. (2017) Amitraz and its metabolite differentially activate alpha- and beta-adrenergic-  
751 like octopamine receptors. Pest Manag Sci 73:984-990. doi:10.1002/ps.4412
- 752 Koh-Tan HH, Strachan E, Cooper K, Bell-Sakyi L, Jonsson NN (2016) Identification of a novel  
753 beta-adrenergic octopamine receptor-like gene (betaAOR-like) and increased ATP-  
754 binding cassette B10 (ABCB10) expression in a *Rhipicephalus microplus* cell line  
755 derived from acaricide-resistant ticks. Parasit Vectors 9:425. doi:10.1186/s13071-016-  
756 1708-x

- 757 Kulhanek K, Garavito A, vanEngelsdorp D (2021) Accelerated *Varroa destructor* population  
758 growth in honey bee (*Apis mellifera*) colonies is associated with visitation from non-  
759 natal bees. Scientific reports 11:7092. doi:10.1038/s41598-021-86558-8
- 760 Kumar R (2019) Molecular markers and their application in the monitoring of acaricide  
761 resistance in *Rhipicephalus microplus*. Exp Appl Acarol 78:149-172.  
762 doi:10.1007/s10493-019-00394-0
- 763 Li X, Zhou M, Huang W, Yang H (2017) N-glycosylation of the beta2 adrenergic receptor  
764 regulates receptor function by modulating dimerization. FEBS J 284:2004-2018.  
765 doi:10.1111/febs.14098
- 766 Liu N, Li T, Wang Y, Liu S (2021) G-Protein Coupled Receptors (GPCRs) in Insects-A  
767 Potential Target for New Insecticide Development. Molecules 26.  
768 doi:10.3390/molecules26102993
- 769 Lu HM et al. (2017) Ligand-binding characterization of simulated beta-adrenergic-like  
770 octopamine receptor in *Schistocerca gregaria* via progressive structure simulation.  
771 Journal of molecular graphics & modelling 77:25-32. doi:10.1016/j.jmngm.2017.07.025
- 772 Maggi MD, Ruffinengo SR, Damiani N, Sardella NH, Eguaras MJ (2009) First detection of  
773 *Varroa destructor* resistance to coumaphos in Argentina. Experimental and Applied  
774 Acarology 47:317-320. doi:DOI 10.1007/s10493-008-9216-0
- 775 Maggi MD, Ruffinengo SR, Mendoza Y, Ojeda P, Ramallo G, Floris I, Eguaras MJ (2011)  
776 Susceptibility of *Varroa destructor* (Acari: Varroidae) to synthetic acaricides in  
777 Uruguay: *Varroa* mites' potential to develop acaricide resistance. Parasitol Res 108:815-  
778 821. doi:DOI 10.1007/s00436-010-2122-5
- 779 Maggi MD, Ruffinengo SR, Negri P, Eguaras MJ (2010) Resistance phenomena to amitraz from  
780 populations of the ectoparasitic mite *Varroa destructor* of Argentina. Parasitol Res  
781 107:1189-1192. doi:10.1007/s00436-010-1986-8
- 782 Marsh L (2015) Strong ligand-protein interactions derived from diffuse ligand interactions with  
783 loose binding sites. Biomed Res Int 2015:746980. doi:10.1155/2015/746980
- 784 Martin S, Hogarth A, Van Breda J, Perrett J (1998) A scientific note on *Varroa jacobsoni*  
785 Oudemans and the collapse of *Apis mellifera* L. colonies in the United Kingdom.  
786 Apidologie 29:369-370
- 787 Medici SK, Maggi MD, Sarlo EG, Ruffinengo S, Marioli JM, Eguaras MJ (2016) The presence  
788 of synthetic acaricides in beeswax and its influence on the development of resistance in  
789 *Varroa destructor*. J Apicult Res 54:267-274. doi:10.1080/00218839.2016.1145407
- 790 Milani N (1995) The resistance of *Varroa-Jacobsoni* Oud to pyrethroids - a laboratory assay.  
791 Apidologie 26:415-429
- 792 Milani N, Della Vedova G (2002) Decline in the proportion of mites resistant to fluvalinate in a  
793 population of *Varroa destructor* not treated with pyrethroids. Apidologie 33:417-422.  
794 doi:10.1051/apido:2002028
- 795 Millán-Leiva A, Marín O, Christmon K, vanEngelsdorp D, González-Cabrera J (2021a)  
796 Mutations associated with pyrethroid resistance in *Varroa* mite, a parasite of honey  
797 bees, are widespread across the United States. Pest Manag Sci 77:3241-3249.  
798 doi:10.1002/ps.6366

- 799 Millán-Leiva A et al. (2021b) Mutations associated with pyrethroid resistance in the honey bee  
800 parasite *Varroa destructor* evolved as a series of parallel and sequential events. Journal  
801 of Pest Science. doi:10.1007/s10340-020-01321-8
- 802 Mitton GA et al. (2018) *Varroa destructor*: when reversion to coumaphos resistance does not  
803 happen. J Apicult Res 57:536-540. doi:10.1080/00218839.2018.1475038
- 804 Mozes-Koch R, Slabezki Y, Efrat H, Kalev H, Kamer Y, Yakobson BA, Dag A (2000) First  
805 detection in Israel of fluvalinate resistance in the varroa mite using bioassay and  
806 biochemical methods. Experimental and Applied Acarology 24:35-43. doi:Doi  
807 10.1023/A:1006379114942
- 808 Nørskov-Lauritsen L, Bräuner-Osborne H (2015) Role of post-translational modifications on  
809 structure, function and pharmacology of class C G protein-coupled receptors. Eur J  
810 Pharmacol 763:233-240. doi:<https://doi.org/10.1016/j.ejphar.2015.05.015>
- 811 Omasits U, Ahrens CH, Muller S, Wollscheid B (2014) Protter: interactive protein feature  
812 visualization and integration with experimental proteomic data. Bioinformatics 30:884-  
813 886. doi:10.1093/bioinformatics/btt607
- 814 Page SW (2008) Antiparasitic drugs. In: Maddison JE, Page SW, Church DB (eds) Small  
815 Animal Clinical Pharmacology (Second Edition). W.B. Saunders, Edinburgh, pp 198-  
816 260. doi:<https://doi.org/10.1016/B978-070202858-8.50012-9>
- 817 Patwardhan A, Cheng N, Trejo J (2021) Post-Translational Modifications of G Protein–Coupled  
818 Receptors Control Cellular Signaling Dynamics in Space and Time. Pharmacological  
819 Reviews 73:120-151. doi:10.1124/pharmrev.120.000082
- 820 Rader AJ, Anderson G, Isin B, Khorana HG, Bahar I, Klein-Seetharaman J (2004) Identification  
821 of core amino acids stabilizing rhodopsin. Proc Natl Acad Sci U S A 101:7246-7251.  
822 doi:10.1073/pnas.0401429101
- 823 Ramsey SD et al. (2019) *Varroa destructor* feeds primarily on honey bee fat body tissue and not  
824 hemolymph. Proc Natl Acad Sci U S A 116:1792-1801. doi:10.1073/pnas.1818371116
- 825 Rinkevich FD (2020) Detection of amitraz resistance and reduced treatment efficacy in the  
826 Varroa Mite, *Varroa destructor*, within commercial beekeeping operations. Plos One  
827 15:e0227264. doi:10.1371/journal.pone.0227264
- 828 Rodríguez-Dehaibes SR, Otero-Colina G, Sedas VP, Jiménez JAV (2005) Resistance to amitraz  
829 and flumethrin in *Varroa destructor* populations from Veracruz, Mexico. J Apicult Res  
830 44:124-125. doi:10.1080/00218839.2005.11101162
- 831 Roeder T (2005) Tyramine and octopamine: ruling behavior and metabolism. Annu Rev  
832 Entomol 50:447-477. doi:10.1146/annurev.ento.50.071803.130404
- 833 Rosenkranz P, Aumeier P, Ziegelmann B (2010) Biology and control of *Varroa destructor*. J  
834 Invertebr Pathol 103:S96-S119. doi:10.1016/j.jip.2009.07.016
- 835 Sammataro D, Untalan P, Guerrero F, Finley J (2005) The resistance of varroa mites (Acari :  
836 Varroidae) to acaricides and the presence of esterase. Int J Acarol 31:67-74
- 837 Solognac M et al. (2005) The invasive Korea and Japan types of *Varroa destructor*, ectoparasitic  
838 mites of the Western honeybee (*Apis mellifera*), are two partly isolated clones.  
839 Proceedings of the Royal Society B-Biological Sciences 272:411-419. doi:DOI  
840 10.1098/rspb.2004.2853

- 841 Steinhauer N, Kulhanek K, Antunez K, Human H, Chantawannakul P, Chauzat MP,  
842 vanEngelsdorp D (2018) Drivers of colony losses. *Curr Opin Insect Sci* 26:142-148.  
843 doi:10.1016/j.cois.2018.02.004
- 844 Techer MA et al. (2019) Divergent evolutionary trajectories following speciation in two  
845 ectoparasitic honey bee mites. *Commun Biol* 2:357. doi:10.1038/s42003-019-0606-0
- 846 Traynor KS et al. (2020) *Varroa destructor*: A Complex Parasite, Crippling Honey Bees  
847 Worldwide. *Trends Parasitol* 36:592-606. doi:10.1016/j.pt.2020.04.004
- 848 Venselaar H, te Beek TAH, Kuipers RKP, Hekkelman ML, Vriend G (2010) Protein structure  
849 analysis of mutations causing inheritable diseases. An e-Science approach with life  
850 scientist friendly interfaces. *BMC Bioinformatics* 11:548. doi:10.1186/1471-2105-11-  
851 548
- 852 Vlogiannitis S et al. (2021) Reduced proinsecticide activation by cytochrome P450 confers  
853 coumaphos resistance in the major bee parasite *Varroa destructor*. *Proc Natl Acad Sci U*  
854 *S A* 118. doi:10.1073/pnas.2020380118
- 855 Yang J, Zhang Y (2015) I-TASSER server: new development for protein structure and function  
856 predictions. *Nucleic Acids Res* 43:W174-181. doi:10.1093/nar/gkv342
- 857 Zhang D, Zhao Q, Wu B (2015) Structural studies of G protein-coupled receptors. *Mol Cells*  
858 38:836-842. doi:10.14348/molcells.2015.0263
- 859
- 860

## TABLES

Table 1. Frequency of the N87S mutation in the samples collected from several French departments.

| <b>Colony</b> | <b>Department</b>            | <b>n</b> | <b>Last treatment</b> | <b>Collection</b> | <b>% N87S mutation</b> |
|---------------|------------------------------|----------|-----------------------|-------------------|------------------------|
| DTRA          | Isère (38)                   | 24       | Amitraz               | POST-Treatment    | 100 %                  |
| MAP           | Loire (42)                   | 24       | Amitraz               | POST-Treatment    | 75 %                   |
| MHRA          | Isère (38)                   | 24       | Amitraz               | POST-Treatment    | 71 %                   |
| J11           | Puy-de-Dôme (63)             | 23       | Amitraz               | POST-Treatment    | 74 %                   |
| MM16          | Puy-de-Dôme (63)             | 24       | Amitraz               | POST-Treatment    | 58 %                   |
| VBA           | Alpes-de-Haute-Provence (04) | 20       | Oxalic acid           | PRE-Treatment     | 0 %                    |
| AmA           | Maine-et-Loire (49)          | 24       | Oxalic acid           | PRE-Treatment     | 0 %                    |
| DE            | Drôme (26)                   | 19       | Oxalic acid           | PRE-Treatment     | 26 %                   |



## FIGURE LEGENDS

Figure 1. Phylogenetic tree of octopamine receptors across several species of arthropods. Neighbor-Joining tree was constructed in Geneious 9.1.8. Oct $\alpha_2$ R:  $\alpha_2$ -adrenergic-like octopamine receptor; Oct $\beta_1$ R: octopamine  $\beta_1$  receptor; Oct $\beta_2$ R: octopamine  $\beta_2$  receptor; Oct $\beta_3$ R: octopamine  $\beta_3$  receptor; TAR1: type 1 tyramine receptor. Ac: *Acyrtosiphon pisum*; Ae: *Aethina tumida*; Am: *Apis dorsata*; Am; *Apis mellifera*; Bi: *Bombus impatiens*; Bm: *Bombyx mori*; Cs: *Centruroides sculpturatus*; Dv: *Diabrotica virgifera virgifera*; Dm: *Drosophila melanogaster*; Go: *Galendromus occidentalis*; Ha: *Helicoverpa armigera*; Is: *Ixodes scapularis*; Lp: *Limulus polyphemus*; Ms: *Manduca sexta*; Mr: *Megachile rotundata*; Nv: *Nicrophorus vespilloides*; Of: *Ostrinia furnacalis*; Pa: *Periplaneta americana*; Rm: *Rhipicephalus microplus*; Tc: *Tribolium castaneum*; Tm: *Tropilaelaps mercedesae*; Vd: *Varroa destructor*. The GenBank accession numbers of the receptor sequences in the tree are listed in Table S2.

Figure 2. Multiple sequence alignment of Oct $\alpha$ R<sub>s</sub> (A), Oct $\beta$ R<sub>s</sub>(B), and TAR1 (C) from diverse acari species. The shaded sequences highlight the amino acid identity level. The seven  $\alpha$ -helices are represented as grey rectangles and numbered as H I-VII. GPCR conserved motifs in helix III (D[E]RY), helix VI (CWxP), helix VII (NP[L/I]IY), and C-terminus (F[R/K]xx[F/L]xxx) are indicated by bars. Vd: *Varroa destructor*; Tm: *Tropilaelaps mercedesae*; Go: *Galendromus occidentalis*; Is: *Ixodes scapularis*; Rm: *Rhipicephalus microplus*.

Figure 3. Three-dimensional structure of Vd-Oct $\beta_2$ R (A) and Vd-TAR1 (B), obtained by modelling with I-TASSER (Yang and Zhang 2015). The receptors are showed as ribbon representation in rainbow colouring (N-terminus, blue; C-terminus, red). The seven  $\alpha$ -helices are connected by three extracellular loops (EL1-3) and three intracellular loops (IL1-3).

Figure 4. Snake plot of Vd\_Oct $\beta$ <sub>2</sub>R with transmembrane domains predicted with Phobius (Kall et al. 2004). N87S mutation (magenta); Y215 mutation (red); putative N-glycosylation residues (diamond); GPCR conserved motifs (yellow); putative disulphide bond residues (blue); predicted ligand binding residues (orange).

Figure 5. Schematic diagram of *oct $\alpha$ <sub>2</sub>r* (A), *oct $\beta$ <sub>2</sub>r* (B), and *tar1* (C) exon-intron gene structure. Coding sequence (CDS) are shown in black. Lengths are represented in bp.

Figure 6. Electropherograms showing the mutations in the sequence of Vd\_Oct $\beta$ <sub>2</sub>R. The substitution of A by G at position 260 of the ORF results in the N87S mutation (A), whereas the substitution of T by C at position 643 results in the Y215H mutation (B).

Figure 7. Timeline of the Y215H mutation incidence in colonies from U.S. The name of the colonies in the Y axis shows the state and the year of sample collection. DE: Delaware; MA: Massachusetts; MI: Michigan; MT: Montana; NJ: New Jersey; OR: Oregon; PA: Pennsylvania. More detailed information can be found in Table S1.

Figure 8. Real-time TaqMan<sup>®</sup> detection of the N87S (A) and Y215H (B) mutations in Vd\_Oct $\beta$ <sub>2</sub>R. In the scatter plots of VIC<sup>®</sup> and 6FAM<sup>™</sup> fluorescence, each dot represents an individual mite. SS homozygotes (N87 or Y215 allele) in red; RS heterozygotes in green; RR homozygotes (S87 or H215 allele) in blue.

# TAR1

## Oct $\alpha$ 2-R

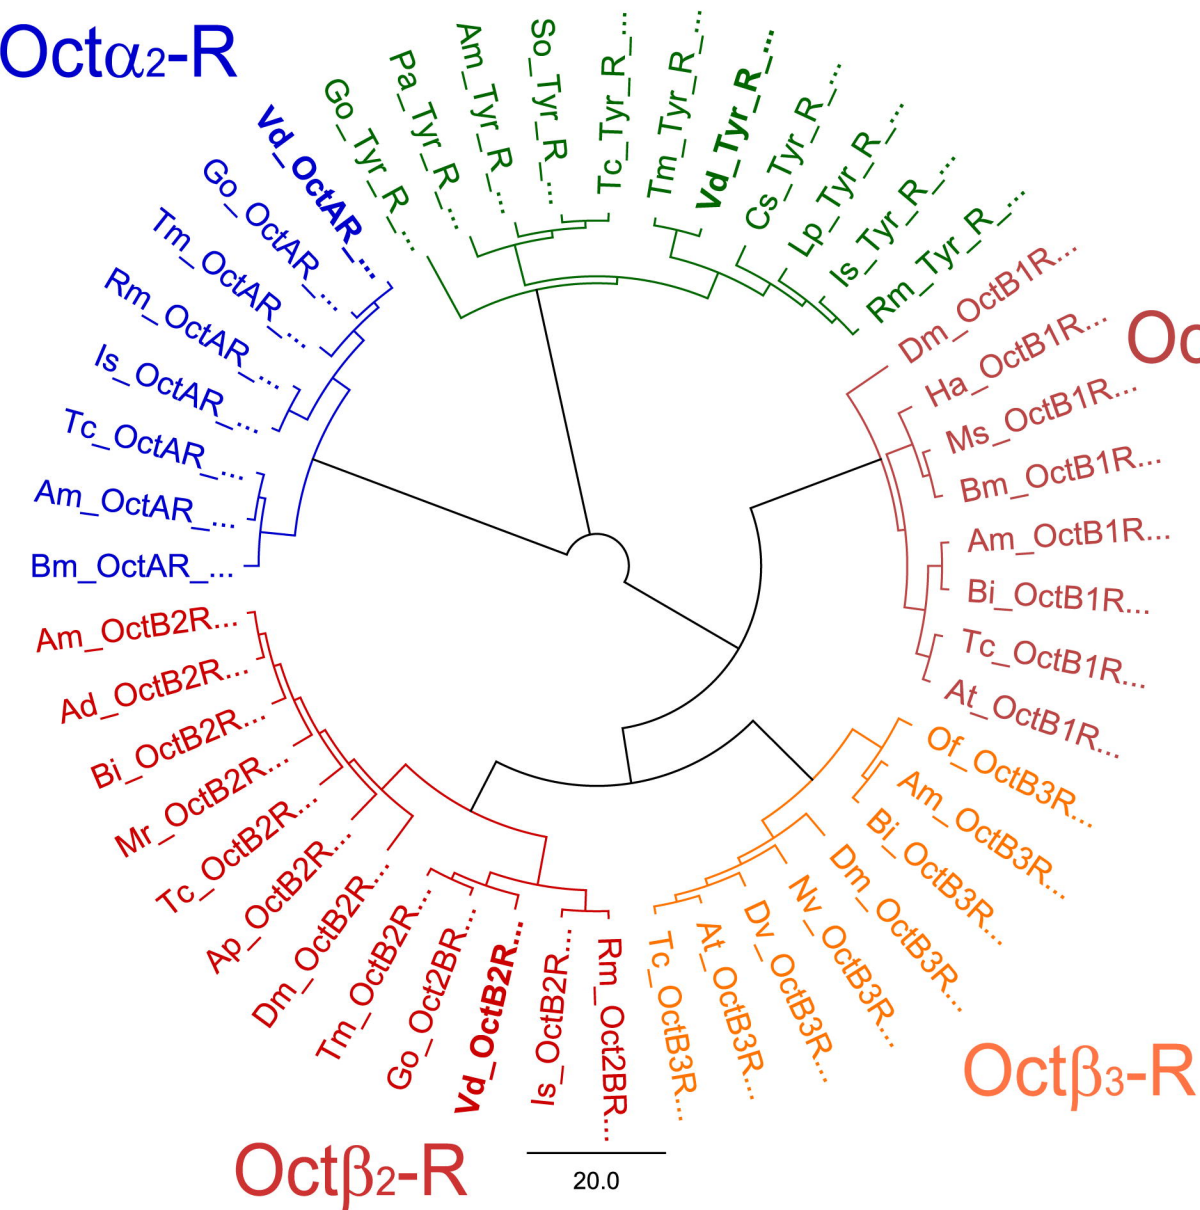

## Oct $\beta$ 1-R

## Oct $\beta$ 3-R

## Oct $\beta$ 2-R



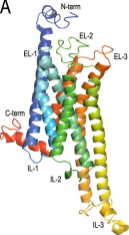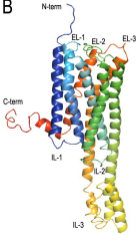

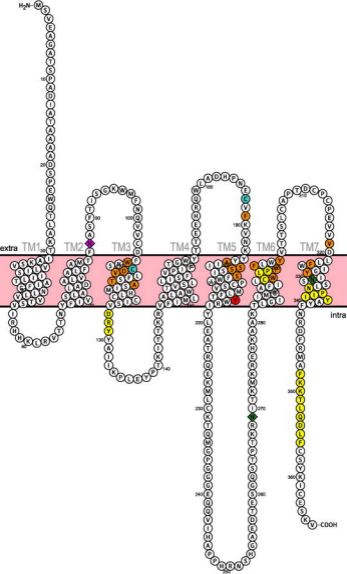

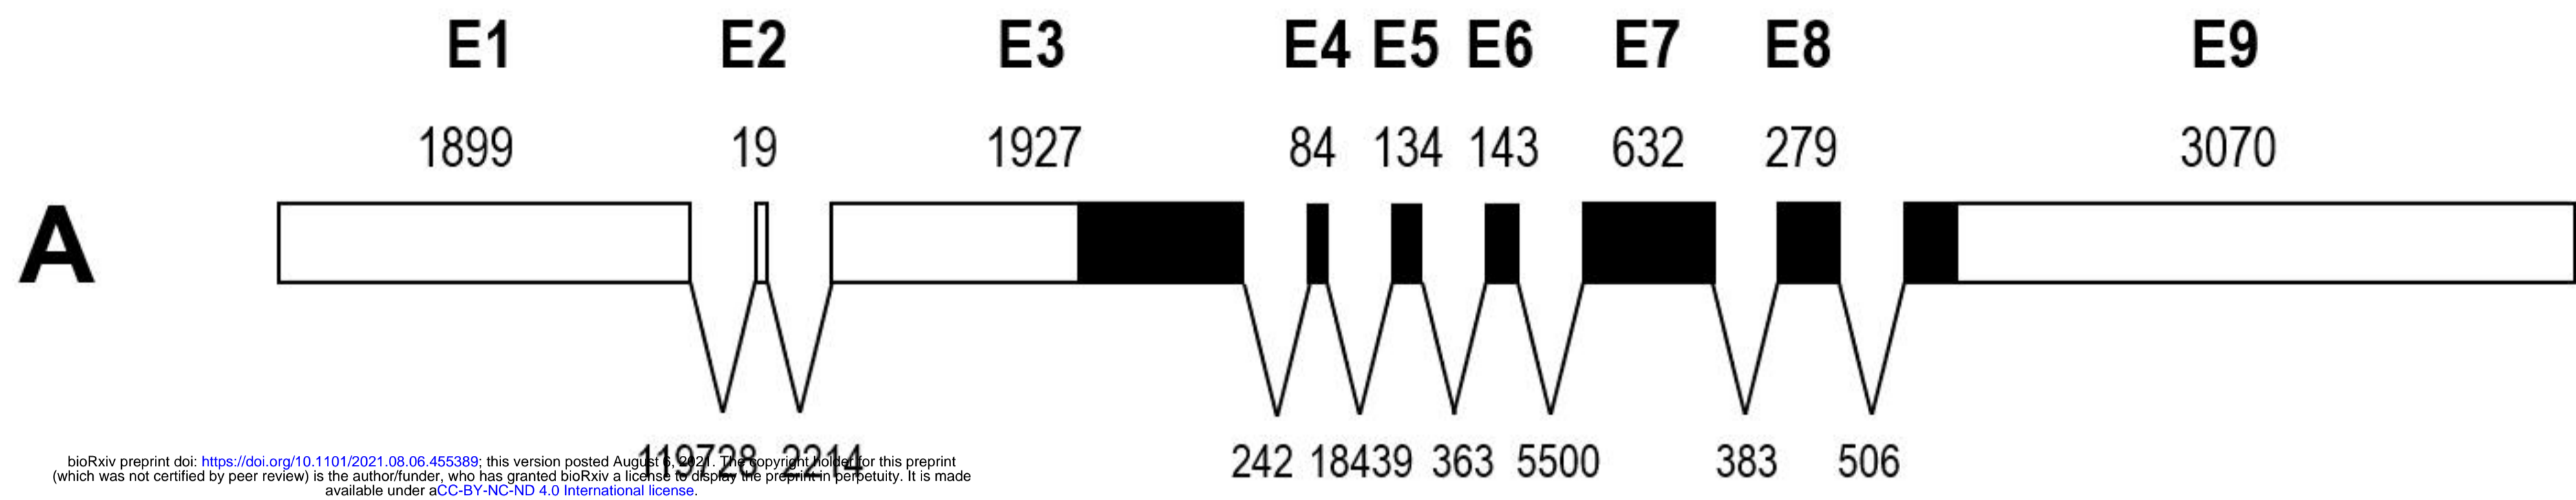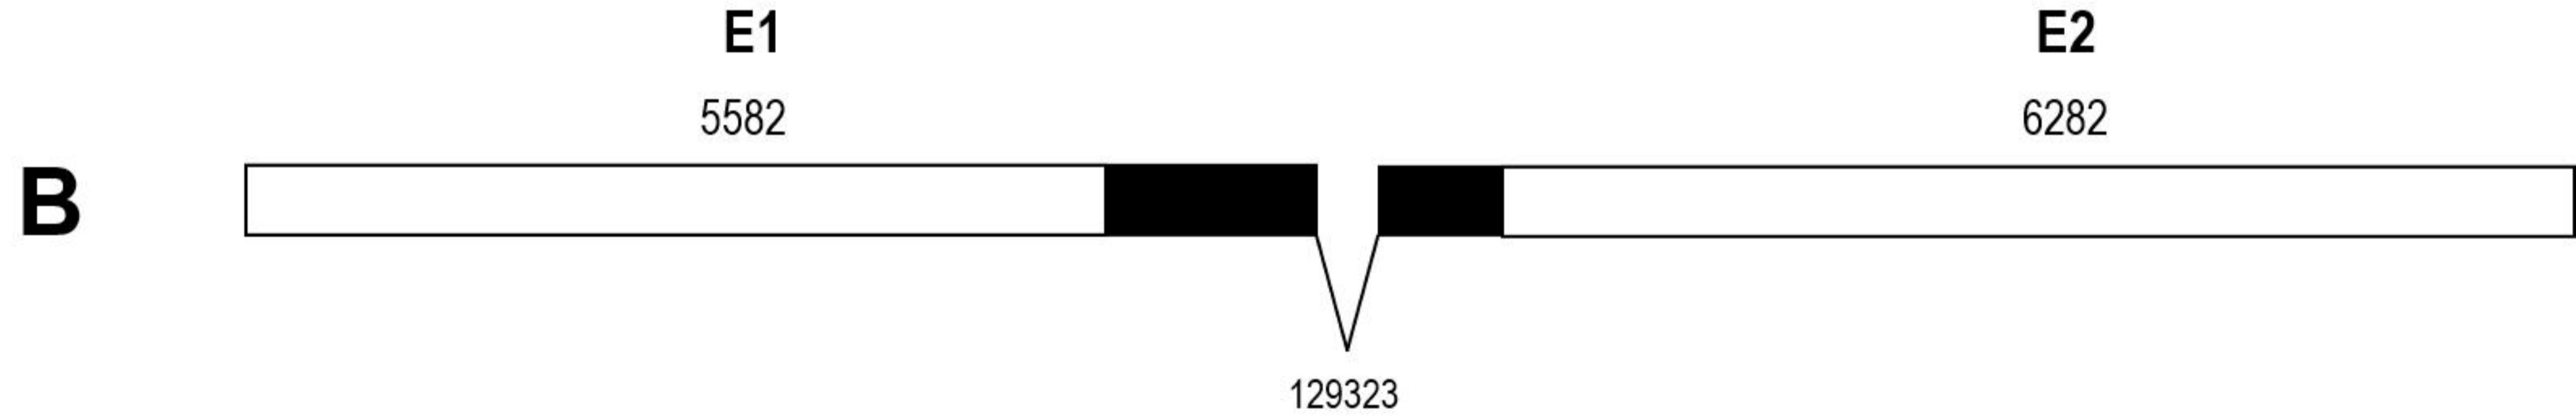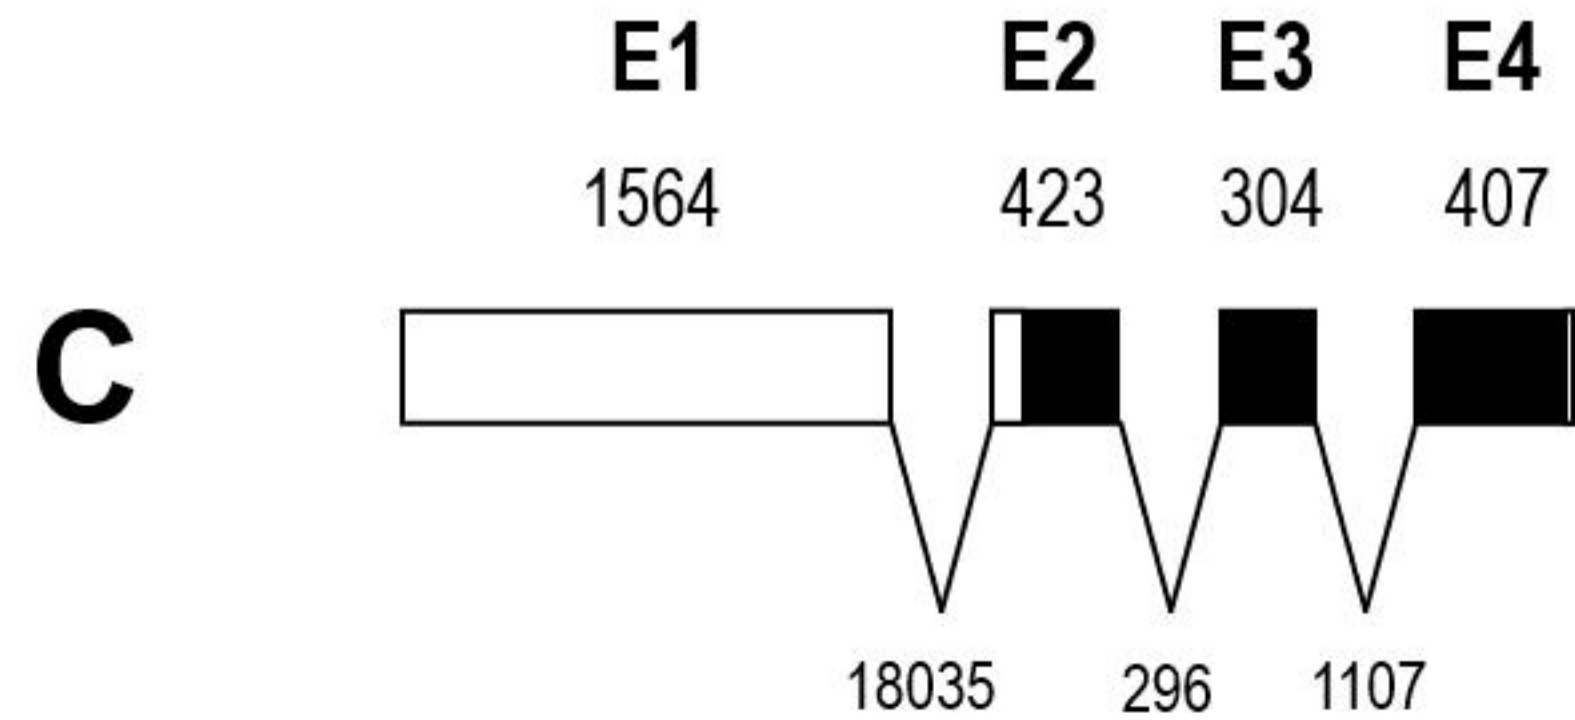

**A**

260

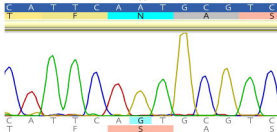**B**

643

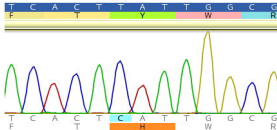



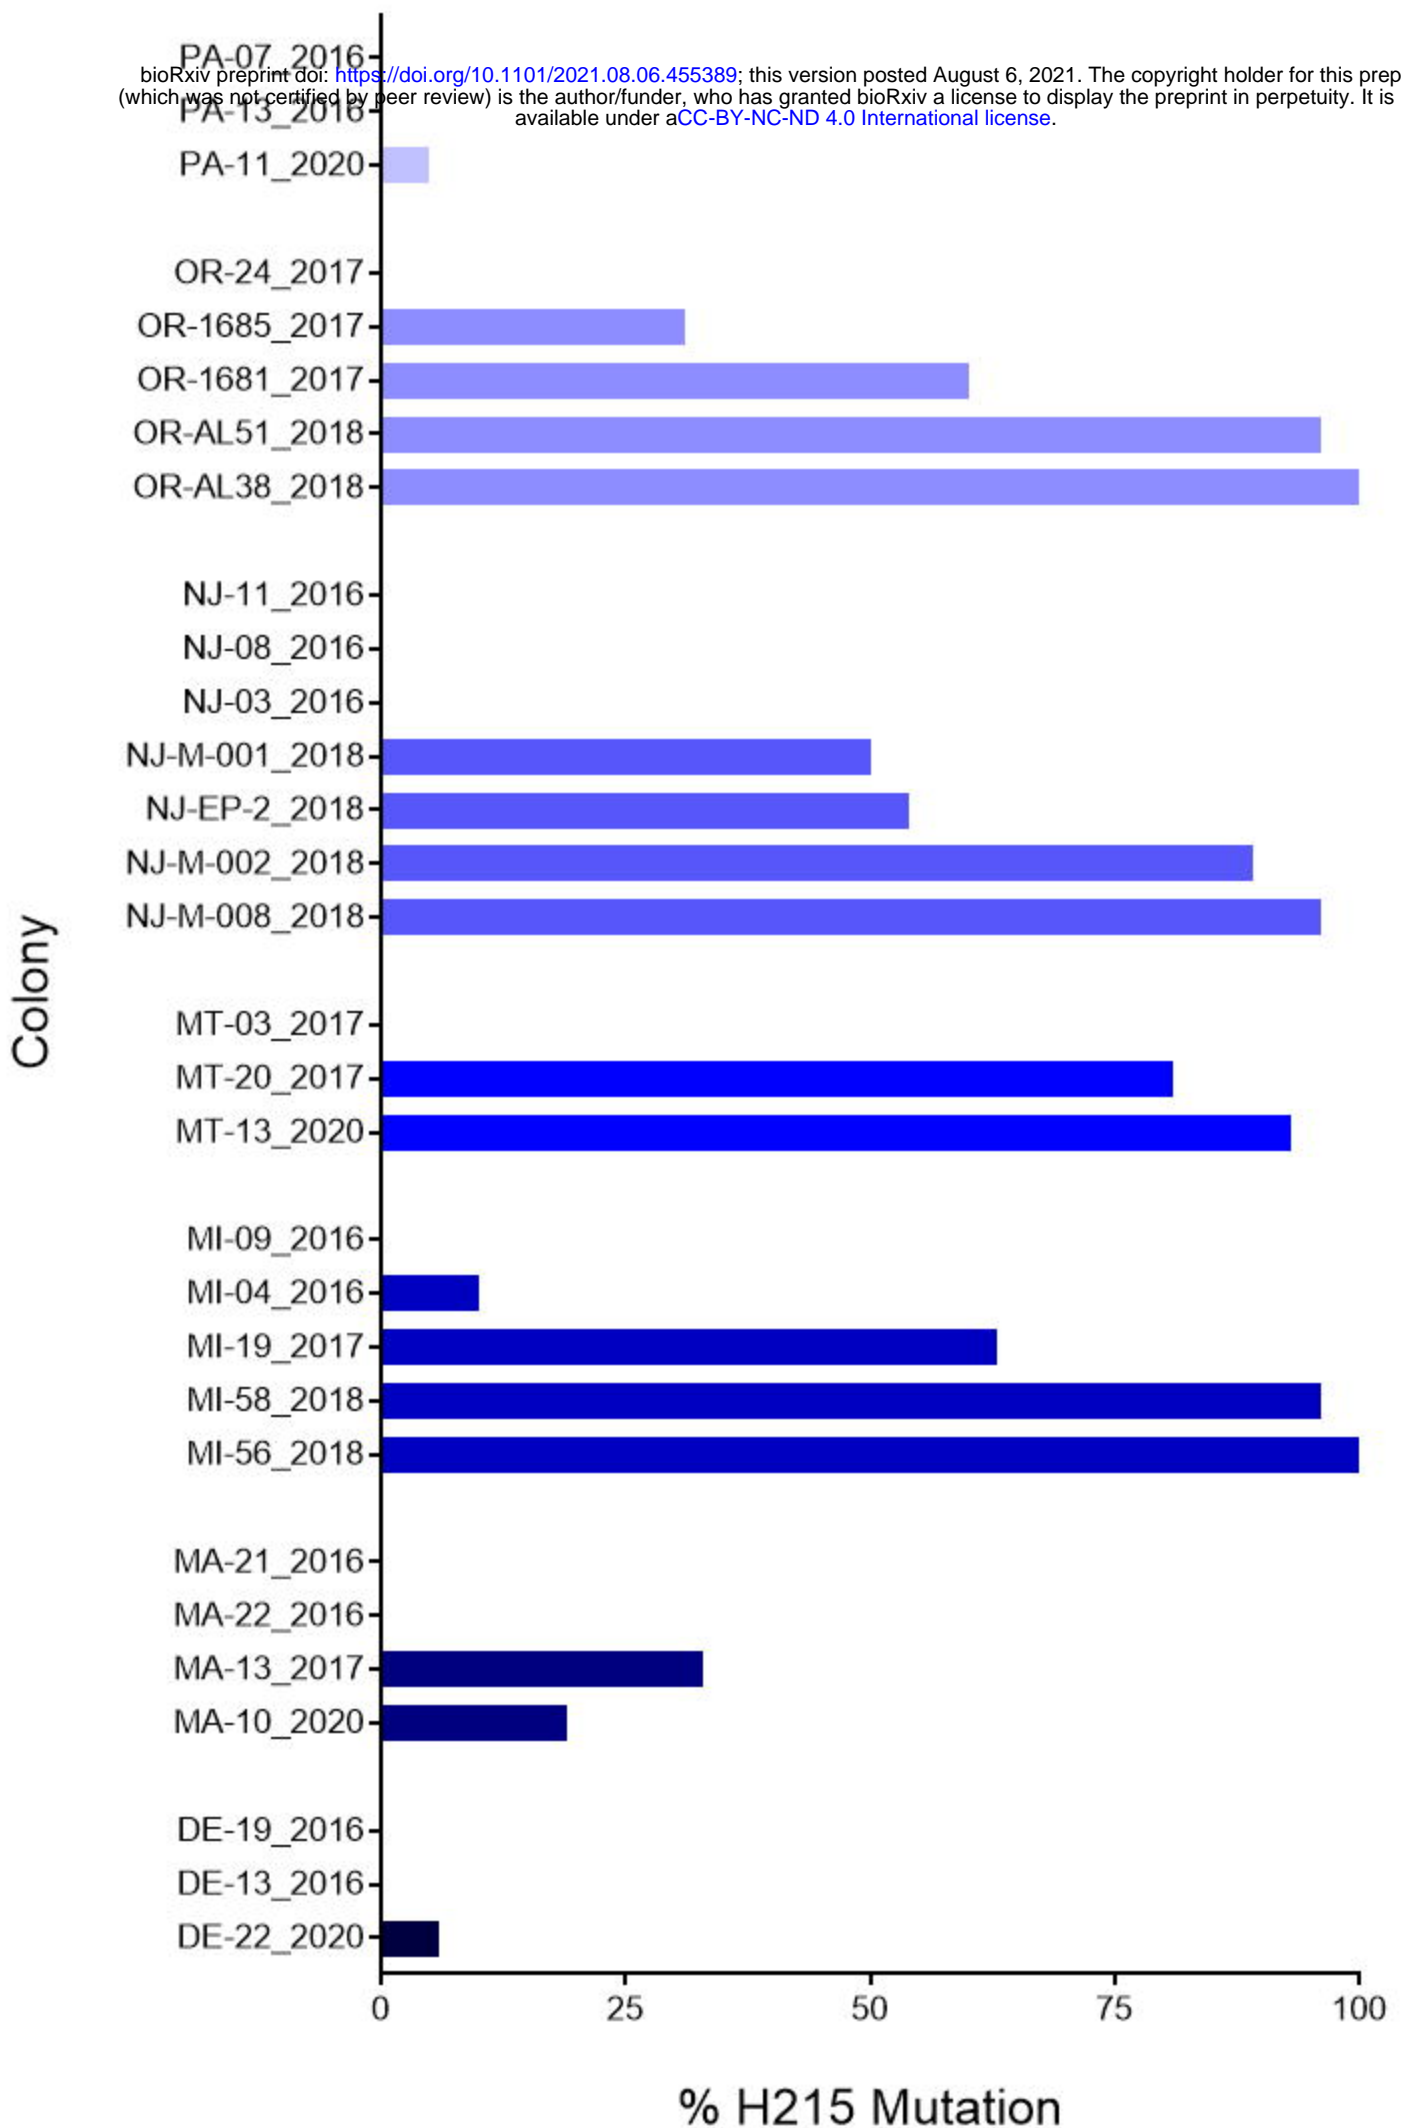

**A**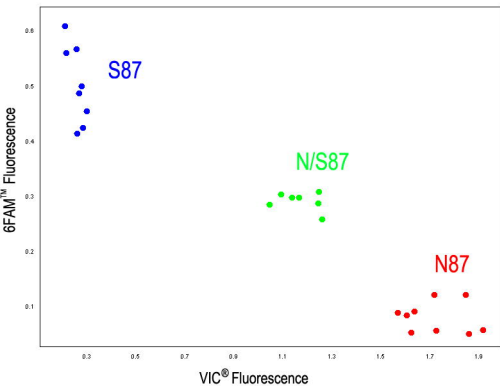**B**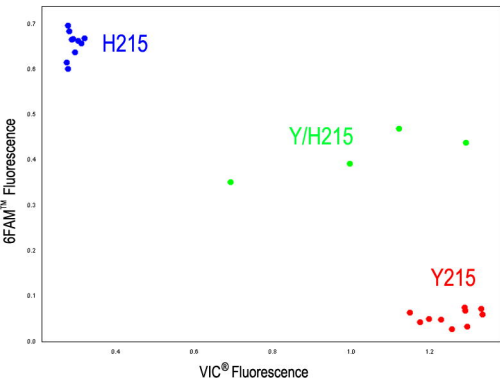

Source: https://www.biorxiv.org/content/10.1101/2021.08.06.455389v1.full.pdf
